# Supplementary material for: An Audit of Pre-Pregnancy Maternal Obesity and Diabetes Screening in Rural Regional Tasmania and Its Impact on Pregnancy and Neonatal Outcomes
Source: MDPI journal article supplement (doi:10.3390/ijerph182212006), 2021-11-16
Supplement: s1 [file s1]

## Additional Materials.

### Standard classifications and recommendations

Table S1: Diagnostic criteria for GDM

| OGTT            |                                   |
|-----------------|-----------------------------------|
| Fasting glucose | ≥5.1 mmol/L                       |
| 1-hr glucose    | ≥10 mmol/L                        |
| 2-hr glucose    | ≥8.5 mmol/L                       |
| <b>HbA1c</b>    | ≥5.9% (1 <sup>st</sup> trimester) |
| Fasting BG      | ≥ 5.1 (post 12 weeks)             |

GDM was categorised according to the current recommendations for screening of GDM in Australia, a 3-hour OGTT recommended at 24–28 weeks of pregnancy (see Table 1)<sup>16</sup> and alternative HbA1c and FBG.

Table S2: Birth weight classifications

| Human birth weight classifications |               |           |               |               |               |               |               |               |               |               |        |
|------------------------------------|---------------|-----------|---------------|---------------|---------------|---------------|---------------|---------------|---------------|---------------|--------|
| Birth weight (grams)               | less 500      | 500 - 999 | 1,000 - 1,499 | 1,500 - 1,999 | 2,000 - 2,499 | 2,500 - 2,999 | 3,000 - 3,499 | 3,500 - 3,999 | 4,000 - 4,499 | 4,500 - 4,999 | >5,000 |
| Classification (birth weight)      | Extremely low |           | Very low      | Low           |               | Normal        |               |               | High          |               |        |

Birth weight was classified according to published Human Birth Weight Classifications (see Table 2)<sup>17</sup>.

Table S3: Recommended guidelines for weight gain during pregnancy

| BMI                   | Classification  | Recommended Gestational Weight Gain |
|-----------------------|-----------------|-------------------------------------|
| <b>Less than 18.5</b> | Underweight     | 12.5 – 18.0 kg                      |
| <b>18.5-24.9</b>      | Normal          | 11.5 – 16.0 kg                      |
| <b>25-29.9</b>        | Overweight      | 6.8 – 11.3 kg                       |
| <b>30 to 34.99</b>    | Obesity class 1 | 5.0 – 9.0 kg                        |
| <b>35 to 39.99</b>    | Obesity class 2 |                                     |
| <b>More than 40</b>   | Morbidly Obese  |                                     |

*Recommendations of the Royal Australian and New Zealand College of Obstetricians and Gynaecologists 2009*  
*Classification of BMI according to World Health Organisation (WHO)*

## Supplementary Results Tables including full regression model covariates

### Footnotes to Supplementary Tables S4 and S5

- <sup>1</sup> BMI at conception, and gestational weight gain (GWG) status at delivery, were estimated using the GWG calculator. Mothers were categorised as having GWG values within, above or below recommendations the Institute of Medicine Guidelines at the time of delivery.
- <sup>2</sup> 1,368 mothers were screened for gestational diabetes mellitus (GDM) during pregnancy or had been diagnosed with diabetes (Type 1 or Type 2) prior to this pregnancy. 714 mothers were not screened for GDM during this pregnancy
- <sup>3</sup> Socio-economic Index for Australia (SEIFA) for disadvantage (Australian Bureau of Statistics 2016 census) was estimated using the Statistical Area 1 (ABS census area definition) place of residence of the mother during pregnancy. The Low SEIFA group had scores less than 898, a third: two-thirds partition
- <sup>4</sup> 2,132 mothers had adequate weight/height measurements to estimate her BMI at conception using the GWG calculator (at least one height and weight measurement: Tables show the number (Total) and % of mothers in each BMI range; and number of women with GDM plus those with Type1 and Type2 diabetes mellitus (GDM).
- <sup>5</sup> The mean birth weight of the babies of women in each BMI range (and other predictors) were estimated using general linear modelling adjusted for maternal age range; low SEIFA; current smoking; GDM screening status; prematurity; hypertension and/or pre-eclampsia. The results shown were mean (standard deviation SD) and mean difference ( $\Delta$ ; 95% confidence intervals; P-values). The predictor grouping used as the comparator for each covariate for the comparisons was the one with a  $\Delta$  of 0.00. These full model results correspond with the summary results shown in Table 4 in the main paper.

### Footnotes to Supplementary Tables S6 to S22

- <sup>1</sup> BMI at conception, and gestational weight gain (GWG) status at delivery, were estimated using the GWG calculator. Mothers were categorised as having GWG values within, above or below recommendations the Institute of Medicine Guidelines at the time of delivery.
- <sup>2</sup> 1,368 mothers were screened for gestational diabetes mellitus (GDM) during pregnancy or had been diagnosed with diabetes (Type 1 or Type 2) prior to this pregnancy. 714 mothers were not screened for GDM during this pregnancy
- <sup>3</sup> Socio-economic Index for Australia (SEIFA) for disadvantage (Australian Bureau of Statistics 2016 census) was estimated using the Statistical Area 1 (ABS census area definition) place of residence of the mother during pregnancy. The Low SEIFA group had scores less than 898, a third: two-thirds partition
- <sup>4</sup> 2,132 mothers had adequate weight/height measurements to estimate her BMI at conception using the GWG calculator: Tables show the number (Total) and % of mothers in each BMI range; and number of women with GDM plus those with Type1 and Type2 diabetes mellitus (GDM).
- <sup>5</sup> The percentage of women diagnosed with the outcome condition in each predictor range (BMI and GWG ranges) in whom the outcome condition occurred was estimated using Poisson regression adjusted for the covariates shown in the models; shown as both percentage of mothers with the condition of each analysis (95% confidence intervals), and incidence rate ratio (IRR; 95%CI; P-values). The healthy BMI range (18.5-25 kg.m<sup>2</sup>) was used as the comparator for the mean IRR comparisons. These full model results correspond with the summary results shown in Tables 4, 5 and 6 in the main paper.

Tables S4 to S9 show the associations between baby weight and duration of pregnancy as outcomes and maternal predictors of those outcomes. These are expansions of Table 1 in the main paper

Table S4: The effect of BMI status at conception and GWG at delivery on the birth weight of baby

| Predictor                                           | Predictor groupings | Group % BMI<br>4 | n     | Mean weight (kg) <sup>5</sup> | SD  | Mean $\Delta$ (kg)<br>5 | 95%CI          | P-value |
|-----------------------------------------------------|---------------------|------------------|-------|-------------------------------|-----|-------------------------|----------------|---------|
| Outcome: Baby birth weight                          |                     |                  |       |                               |     |                         |                |         |
| BMI (kg.m <sup>2</sup> ) at conception <sup>1</sup> | <18.5               | 3.7%             | 64    | 3228                          | 720 | -145                    | (-260, -30)    | 0.013   |
|                                                     | 18.5-25             | 40.6%            | 704   | 3373                          | 657 | 0                       |                |         |
|                                                     | 25-30               | 27.0%            | 469   | 3471                          | 659 | 98                      | (39, 156)      | 0.0011  |
|                                                     | 30-35               | 14.1%            | 244   | 3454                          | 674 | 81                      | (6, 156)       | 0.033   |
|                                                     | 35+                 | 14.6%            | 254   | 3546                          | 656 | 173                     | (95, 251)      | <0.0001 |
| Birth GWG versus recommendations <sup>1</sup>       | Within              | 43.5%            | 754   | 3373                          | 728 | 0                       |                |         |
|                                                     | Above               | 43.6%            | 757   | 3541                          | 569 | 167                     | (116, 219)     | <0.0001 |
|                                                     | Below               | 12.9%            | 224   | 3238                          | 675 | -135                    | (-213, -58)    | <0.0001 |
| DM screening status & result <sup>2</sup>           | GDM excluded        | 56.0%            | 972   | 3373                          | 592 | 0                       |                |         |
|                                                     | GDM diagnosed       | 10.5%            | 183   | 3436                          | 665 | 63                      | (-27, 153)     | 0.17    |
|                                                     | GDM not screened    | 33.4%            | 580   | 3320                          | 773 | -53                     | (-105, -2)     | 0.043   |
| Whether premature                                   | No prematurity      | 95.2%            | 1,651 | 3373                          | 532 | 0                       |                |         |
|                                                     | Prem: 32-35 weeks   | 3.1%             | 53    | 2078                          | 485 | -1295                   | (-1412, -1178) | <0.0001 |
|                                                     | Prem: <32 weeks     | 1.8%             | 31    | 923                           | 487 | -2450                   | (-2627, -2272) | <0.0001 |
| Age of mother (years)                               | Mother <25          | 28.2%            | 490   | 3373                          | 688 | 0                       |                |         |
|                                                     | Mother 25-35        | 59.7%            | 1,035 | 3404                          | 643 | 31                      | (-24, 86)      | 0.27    |
|                                                     | Mother 35+          | 12.1%            | 210   | 3436                          | 746 | 63                      | (-21, 146)     | 0.14    |
| SEIFA band <sup>3</sup>                             | High/middle SEIFA   | 65.2%            | 1,132 | 3373                          | 634 | 0                       |                |         |
|                                                     | Low SEIFA           | 34.8%            | 603   | 3357                          | 732 | -17                     | (-69, 36)      | 0.54    |
| Smoking                                             | Current non-smoker  | 74.3%            | 1,289 | 3373                          | 617 | 0                       |                |         |
|                                                     | Current smoker      | 25.7%            | 446   | 3287                          | 762 | -86                     | (-111, -62)    | <0.0001 |
| Hypertension and/or Pre-eclampsia                   | No HT/P-Ecl         | 93.3%            | 1,618 | 3373                          | 672 | 0                       |                |         |
|                                                     | HT/P-Ecl            | 6.7%             | 117   | 3147                          | 638 | -226                    | (-324, -129)   | <0.0001 |

Table S5: The effect of BMI status at conception and GWG at delivery on the gestational age at delivery

| Predictor                                   | Predictor groupings | Group % BMI<br>4 | n     | Mean age (weeks) 5 | SD  | Mean Δ<br>(weeks) 5 | 95%CI          | P-value |
|---------------------------------------------|---------------------|------------------|-------|--------------------|-----|---------------------|----------------|---------|
| Outcome: Gestational age at delivery        |                     |                  |       |                    |     |                     |                |         |
| BMI (kg.m <sup>2</sup> ) at<br>conception 1 | <18.5               | 3.7%             | 64    | 38.3               | 3.5 | -0.73               | (-1.60, 0.13)  | 0.097   |
|                                             | 18.5-25             | 40.6%            | 704   | 39.0               | 2.4 | 0.00                |                |         |
|                                             | 25-30               | 27.0%            | 469   | 39.1               | 2.4 | 0.09                | (-0.18, 0.36)  | 0.52    |
|                                             | 30-35               | 14.1%            | 244   | 39.0               | 2.7 | 0.01                | (-0.37, 0.40)  | 0.95    |
|                                             | 35+                 | 14.6%            | 254   | 39.0               | 2.1 | -0.02               | (-0.37, 0.33)  | 0.89    |
| Birth GWG versus<br>recommendations<br>1    | Within              | 43.5%            | 754   | 39.0               | 3.0 | 0.00                |                |         |
|                                             | Above               | 43.6%            | 757   | 39.6               | 1.8 | 0.60                | (0.37, 0.84)   | <0.0001 |
|                                             | Below               | 12.9%            | 224   | 39.3               | 2.4 | 0.33                | (-0.05, 0.71)  | 0.090   |
| DM screening<br>status & result 2           | GDM excluded        | 56.0%            | 972   | 39.0               | 1.8 | 0.00                |                |         |
|                                             | GDM diagnosed       | 10.5%            | 183   | 38.2               | 2.0 | -0.80               | (-1.14, -0.46) | <0.0001 |
|                                             | GDM not screened    | 33.4%            | 580   | 38.4               | 3.3 | -0.64               | (-0.92, -0.36) | <0.0001 |
| Age of mother<br>(years)                    | Mother <25          | 28.2%            | 490   | 39.0               | 2.5 | 0.00                |                |         |
|                                             | Mother 25-35        | 59.7%            | 1,035 | 39.0               | 2.3 | 0.03                | (-0.24, 0.29)  | 0.85    |
|                                             | Mother 35+          | 12.1%            | 210   | 38.6               | 3.0 | -0.37               | (-0.84, 0.10)  | 0.12    |
| SEIFA band 3                                | High/middle SEIFA   | 65.2%            | 1,132 | 39.0               | 2.3 | 0.00                |                |         |
|                                             | Low SEIFA           | 34.8%            | 603   | 38.9               | 2.8 | -0.12               | (-0.38, 0.13)  | 0.34    |
| Smoking                                     | Current non-smoker  | 74.3%            | 1,289 | 39.0               | 2.2 | 0.00                |                |         |
|                                             | Current smoker      | 25.7%            | 446   | 38.7               | 3.1 | -0.31               | (-0.44, -0.17) | <0.0001 |
| Hypertension and/or<br>Pre-eclampsia        | No HT/P-Ecl         | 93.3%            | 1,618 | 39.0               | 2.5 | 0.00                |                |         |
|                                             | HT/P-Ecl            | 6.7%             | 117   | 38.3               | 1.8 | -0.73               | (-1.07, -0.38) | <0.0001 |

Table S6: The effect of BMI status at conception on the rate of gestational weight gain below recommendations

| Predictor                                              | Predictor groupings | Group %<br>BMI <sup>4</sup> | n   | N     | % in group with<br>condition <sup>5</sup> | 95%CI          | IRR <sup>5</sup> | 95%CI        | P-value |
|--------------------------------------------------------|---------------------|-----------------------------|-----|-------|-------------------------------------------|----------------|------------------|--------------|---------|
| Outcome: Gestational weight gain below recommendations |                     |                             |     |       |                                           |                |                  |              |         |
| BMI (kg.m <sup>2</sup> ) at<br>conception <sup>1</sup> | <18.5               | 3.7%                        | 15  | 64    | 21.2%                                     | (13.0%, 34.6%) | 2.31             | (1.42, 3.76) | 0.0008  |
|                                                        | 18.5-25             | 40.6%                       | 71  | 704   | 9.2%                                      | (6.7%, 12.7%)  | 1.00             |              |         |
|                                                        | 25-30               | 27.0%                       | 41  | 469   | 7.8%                                      | (5.4%, 11.3%)  | 0.85             | (0.58, 1.22) | 0.37    |
|                                                        | 30-35               | 14.1%                       | 37  | 244   | 13.2%                                     | (9.1%, 19.1%)  | 1.43             | (0.99, 2.07) | 0.056   |
|                                                        | 35+                 | 14.6%                       | 60  | 254   | 18.7%                                     | (13.4%, 26.2%) | 2.03             | (1.45, 2.84) | <0.0001 |
| DM screening<br>status & result <sup>2</sup>           | GDM excluded        | 56.0%                       | 113 | 972   | 9.2%                                      | (6.7%, 12.7%)  | 1.00             |              |         |
|                                                        | GDM diagnosed       | 10.5%                       | 44  | 183   | 15.9%                                     | (11.5%, 22.0%) | 1.73             | (1.25, 2.39) | 0.0009  |
|                                                        | GDM not screened    | 33.4%                       | 67  | 580   | 9.1%                                      | (6.9%, 12.1%)  | 0.99             | (0.75, 1.31) | 0.96    |
| Whether<br>premature                                   | No prematurity      | 95.2%                       | 215 | 1,651 | 9.2%                                      | (6.7%, 12.7%)  | 1.00             |              |         |
|                                                        | Prem: 32-35 weeks   | 3.1%                        | 5   | 53    | 6.1%                                      | (2.6%, 14.1%)  | 0.66             | (0.28, 1.54) | 0.34    |
|                                                        | Prem: <32 weeks     | 1.8%                        | 4   | 31    | 7.7%                                      | (3.0%, 19.5%)  | 0.83             | (0.33, 2.12) | 0.70    |
| Age of mother<br>(years)                               | Mother <25          | 29.9%                       | 67  | 490   | 9.2%                                      | (6.7%, 12.7%)  | 1.00             |              |         |
|                                                        | Mother 25-35        | 54.5%                       | 122 | 1,035 | 8.6%                                      | (6.5%, 11.3%)  | 0.93             | (0.71, 1.23) | 0.62    |
|                                                        | Mother 35+          | 15.6%                       | 35  | 210   | 11.5%                                     | (7.9%, 16.6%)  | 1.24             | (0.86, 1.80) | 0.25    |
| SEIFA band <sup>3</sup>                                | High/middle SEIFA   | 58.0%                       | 130 | 1,132 | 9.2%                                      | (6.7%, 12.7%)  | 1.00             |              |         |
|                                                        | Low SEIFA           | 42.0%                       | 94  | 603   | 11.4%                                     | (9.0%, 14.6%)  | 1.24             | (0.97, 1.59) | 0.083   |
| Smoking                                                | Current non-smoker  | 63.4%                       | 142 | 1,289 | 9.2%                                      | (6.7%, 12.7%)  | 1.00             |              |         |
|                                                        | Current smoker      | 36.6%                       | 82  | 446   | 11.1%                                     | (9.9%, 12.3%)  | 1.20             | (1.08, 1.34) | 0.0008  |
| Hypertension and/or<br>Pre-eclampsia                   | No HT/P-Ecl         | 95.5%                       | 214 | 1,618 | 9.2%                                      | (6.7%, 12.7%)  | 1.00             |              |         |
|                                                        | HT/P-Ecl            | 4.5%                        | 10  | 117   | 5.0%                                      | (2.8%, 8.8%)   | 0.54             | (0.31, 0.95) | 0.033   |

Table S7: The effect of BMI status at conception on the rate of gestational weight gain above recommendations

| Predictor                                              | Predictor groupings | Group<br>% BMI <sup>4</sup> | n   | N     | % in group with<br>condition <sup>5</sup> | 95%CI          | IRR <sup>5</sup> | 95%CI        | P-value |
|--------------------------------------------------------|---------------------|-----------------------------|-----|-------|-------------------------------------------|----------------|------------------|--------------|---------|
| Outcome: Gestational weight gain above recommendations |                     |                             |     |       |                                           |                |                  |              |         |
| BMI (kg.m <sup>2</sup> ) at<br>conception <sup>1</sup> | <18.5               | 3.7%                        | 8   | 64    | 14.9%                                     | (7.6%, 29.0%)  | 0.30             | (0.15, 0.58) | 0.0004  |
|                                                        | 18.5-25             | 40.6%                       | 301 | 704   | 49.9%                                     | (43.9%, 56.7%) | 1.00             |              |         |
|                                                        | 25-30               | 27.0%                       | 231 | 469   | 57.3%                                     | (50.6%, 64.8%) | 1.15             | (1.02, 1.30) | 0.028   |
|                                                        | 30-35               | 14.1%                       | 111 | 244   | 52.7%                                     | (44.9%, 61.8%) | 1.06             | (0.90, 1.24) | 0.50    |
|                                                        | 35+                 | 14.6%                       | 106 | 254   | 48.6%                                     | (40.9%, 57.8%) | 0.98             | (0.82, 1.16) | 0.78    |
| DM screening status &<br>result <sup>2</sup>           | GDM excluded        | 56.0%                       | 487 | 972   | 49.9%                                     | (43.9%, 56.7%) | 1.00             |              |         |
|                                                        | GDM diagnosed       | 10.5%                       | 66  | 183   | 35.1%                                     | (28.5%, 43.3%) | 0.70             | (0.57, 0.87) | 0.0010  |
|                                                        | GDM not screened    | 33.4%                       | 204 | 580   | 36.7%                                     | (32.3%, 41.6%) | 0.73             | (0.65, 0.83) | <0.0001 |
| Whether premature                                      | No prematurity      | 95.2%                       | 733 | 1,651 | 49.9%                                     | (43.9%, 56.7%) | 1.00             |              |         |
|                                                        | Prem: 32-35 weeks   | 3.1%                        | 22  | 53    | 47.9%                                     | (34.8%, 65.9%) | 0.96             | (0.70, 1.32) | 0.80    |
|                                                        | Prem: <32 weeks     | 1.8%                        | 2   | 31    | 8.9%                                      | (2.3%, 34.4%)  | 0.18             | (0.05, 0.69) | 0.013   |
| Age of mother (years)                                  | Mother <25          | 29.5%                       | 223 | 490   | 49.9%                                     | (43.9%, 56.7%) | 1.00             |              |         |
|                                                        | Mother 25-35        | 59.2%                       | 448 | 1,035 | 46.7%                                     | (41.5%, 52.5%) | 0.94             | (0.83, 1.05) | 0.27    |
|                                                        | Mother 35+          | 11.4%                       | 86  | 210   | 45.9%                                     | (38.0%, 55.4%) | 0.92             | (0.76, 1.11) | 0.39    |
| SEIFA band <sup>3</sup>                                | High/middle SEIFA   | 64.2%                       | 486 | 1,132 | 49.9%                                     | (43.9%, 56.7%) | 1.00             |              |         |
|                                                        | Low SEIFA           | 35.8%                       | 271 | 603   | 51.6%                                     | (46.2%, 57.7%) | 1.04             | (0.93, 1.16) | 0.54    |
| Smoking                                                | Current non-smoker  | 75.4%                       | 571 | 1,289 | 49.9%                                     | (43.9%, 56.7%) | 1.00             |              |         |
|                                                        | Current smoker      | 24.6%                       | 186 | 446   | 49.4%                                     | (46.9%, 52.2%) | 0.99             | (0.94, 1.05) | 0.75    |
| Hypertension and/or<br>Pre-eclampsia                   | No HT/P-Ecl         | 90.8%                       | 687 | 1,618 | 49.9%                                     | (43.9%, 56.7%) | 1.00             |              |         |
|                                                        | HT/P-Ecl            | 9.2%                        | 70  | 117   | 69.4%                                     | (59.5%, 81.0%) | 1.39             | (1.19, 1.62) | <0.0001 |

Table S8: The effect of BMI status at conception and GWG at delivery on the rate of macrosomia

| Predictor                                              | Predictor groupings | Group %<br>BMI <sup>4</sup> | n   | N     | % in group with<br>condition <sup>5</sup> | 95%CI          | IRR <sup>5</sup> | 95%CI        | P-value |
|--------------------------------------------------------|---------------------|-----------------------------|-----|-------|-------------------------------------------|----------------|------------------|--------------|---------|
| Outcome: Macrosomia (birth weight >4000g)              |                     |                             |     |       |                                           |                |                  |              |         |
| BMI (kg.m <sup>2</sup> ) at<br>conception <sup>1</sup> | <18.5               | 3.7%                        | 0   | 64    | 0.0%                                      | (0.0%, 0.0%)   | 0.00             | (0.00, 0.00) | <0.0001 |
|                                                        | 18.5-25             | 40.6%                       | 77  | 704   | 9.0%                                      | (6.4%, 12.7%)  | 1.00             |              |         |
|                                                        | 25-30               | 27.0%                       | 89  | 469   | 14.3%                                     | (10.8%, 18.9%) | 1.59             | (1.20, 2.10) | 0.0011  |
|                                                        | 30-35               | 14.1%                       | 37  | 244   | 12.0%                                     | (8.3%, 17.3%)  | 1.33             | (0.92, 1.92) | 0.12    |
|                                                        | 35+                 | 14.6%                       | 47  | 254   | 16.0%                                     | (11.4%, 22.5%) | 1.77             | (1.26, 2.49) | 0.0010  |
| Birth GWG versus<br>recommendations<br><sup>1</sup>    | Within              | 43.5%                       | 82  | 754   | 9.0%                                      | (6.4%, 12.7%)  | 1.00             |              |         |
|                                                        | Above               | 43.6%                       | 149 | 757   | 14.9%                                     | (11.7%, 19.1%) | 1.66             | (1.30, 2.12) | <0.0001 |
|                                                        | Below               | 12.9%                       | 19  | 224   | 6.4%                                      | (4.0%, 10.2%)  | 0.71             | (0.44, 1.13) | 0.15    |
| DM screening<br>status & result <sup>2</sup>           | GDM excluded        | 56.0%                       | 147 | 972   | 9.0%                                      | (6.4%, 12.7%)  | 1.00             |              |         |
|                                                        | GDM diagnosed       | 10.5%                       | 34  | 183   | 11.2%                                     | (8.0%, 15.8%)  | 1.25             | (0.89, 1.75) | 0.21    |
|                                                        | GDM not screened    | 33.4%                       | 69  | 580   | 8.1%                                      | (6.3%, 10.5%)  | 0.90             | (0.70, 1.17) | 0.44    |
| Whether<br>premature                                   | No prematurity      | 95.2%                       | 250 | 1,651 | 9.0%                                      | (6.4%, 12.7%)  | 1.00             |              |         |
|                                                        | Prem: 32-35 weeks   | 3.1%                        | 0   | 53    | 0.0%                                      | (0.0%, 0.0%)   | 0.00             | (0.00, 0.00) | <0.0001 |
|                                                        | Prem: <32 weeks     | 1.8%                        | 0   | 31    | 0.0%                                      | (0.0%, 0.0%)   | 0.00             | (0.00, 0.00) | <0.0001 |
| Age of mother<br>(years)                               | Mother <25          | 28.2%                       | 63  | 490   | 9.0%                                      | (6.4%, 12.7%)  | 1.00             |              |         |
|                                                        | Mother 25-35        | 59.7%                       | 158 | 1,035 | 9.5%                                      | (7.3%, 12.5%)  | 1.06             | (0.81, 1.38) | 0.67    |
|                                                        | Mother 35+          | 12.1%                       | 29  | 210   | 8.8%                                      | (5.9%, 13.1%)  | 0.98             | (0.66, 1.46) | 0.91    |
| SEIFA band <sup>3</sup>                                | High/middle SEIFA   | 65.2%                       | 159 | 1,132 | 9.0%                                      | (6.4%, 12.7%)  | 1.00             |              |         |
|                                                        | Low SEIFA           | 34.8%                       | 91  | 603   | 10.1%                                     | (8.0%, 12.8%)  | 1.12             | (0.88, 1.42) | 0.36    |
| Smoking                                                | Current non-smoker  | 74.3%                       | 208 | 1,289 | 9.0%                                      | (6.4%, 12.7%)  | 1.00             |              |         |
|                                                        | Current smoker      | 25.7%                       | 42  | 446   | 7.3%                                      | (6.4%, 8.4%)   | 0.81             | (0.71, 0.93) | 0.0024  |
| Hypertension and/or<br>Pre-eclampsia                   | No HT/P-Ecl         | 93.3%                       | 242 | 1,618 | 9.0%                                      | (6.4%, 12.7%)  | 1.00             |              |         |
|                                                        | HT/P-Ecl            | 6.7%                        | 8   | 117   | 3.2%                                      | (1.7%, 6.2%)   | 0.36             | (0.18, 0.69) | 0.0023  |

Table S9: The effect of BMI status at conception and GWG at delivery on the rate of birth weight less than 2500g

| Predictor                                                                  | Predictor groupings | Group %<br>BMI <sup>4</sup> | n  | N     | % in group with<br>condition <sup>5</sup> | 95%CI         | IRR <sup>5</sup> | 95%CI        | P-value |
|----------------------------------------------------------------------------|---------------------|-----------------------------|----|-------|-------------------------------------------|---------------|------------------|--------------|---------|
| Outcome: Microsomia (birth weight <2500g)                                  |                     |                             |    |       |                                           |               |                  |              |         |
| BMI (kg.m <sup>2</sup> ) at<br>conception <sup>1</sup>                     | <18.5               | 3.6%                        | 6  | 61    | 3.4%                                      | (1.9%, 6.2%)  | 0.73             | (0.41, 1.32) | 0.30    |
|                                                                            | 18.5-25             | 40.6%                       | 49 | 691   | 4.7%                                      | (2.9%, 7.7%)  | 1.00             |              |         |
|                                                                            | 25-30               | 27.1%                       | 27 | 462   | 5.1%                                      | (3.4%, 7.6%)  | 1.08             | (0.73, 1.61) | 0.71    |
|                                                                            | 30-35               | 14.0%                       | 13 | 239   | 5.7%                                      | (3.2%, 10.0%) | 1.21             | (0.69, 2.11) | 0.52    |
|                                                                            | 35+                 | 14.7%                       | 12 | 251   | 4.0%                                      | (2.2%, 7.2%)  | 0.85             | (0.47, 1.53) | 0.59    |
| Birth GWG versus<br>recommendations<br><sup>1</sup>                        | Within              | 42.8%                       | 54 | 729   | 3.9%                                      | (2.9%, 7.7%)  | 1.00             |              |         |
|                                                                            | Above               | 44.3%                       | 31 | 755   | 2.3%                                      | (1.4%, 3.6%)  | 0.60             | (0.41, 0.87) | 0.0068  |
|                                                                            | Below               | 12.9%                       | 22 | 220   | 5.9%                                      | (3.4%, 9.6%)  | 1.54             | (1.00, 2.36) | 0.050   |
| DM screening<br>status & result <sup>2</sup>                               | GDM excluded        | 56.8%                       | 58 | 968   | 4.7%                                      | (2.9%, 7.7%)  | 1.00             |              |         |
|                                                                            | GDM diagnosed       | 10.6%                       | 10 | 181   | 3.5%                                      | (1.9%, 6.3%)  | 0.73             | (0.40, 1.34) | 0.32    |
|                                                                            | GDM not screened    | 32.6%                       | 39 | 555   | 5.3%                                      | (3.7%, 7.5%)  | 1.13             | (0.79, 1.60) | 0.51    |
| Whether<br>premature<br><i>(Prem: &lt;32 weeks excluded in this model)</i> | No prematurity      | 96.9%                       | 65 | 1,651 | 4.7%                                      | (2.9%, 7.7%)  | 1.00             |              |         |
|                                                                            | Prem: 32-35 weeks   | 3.1%                        | 42 | 53    | 85.6%                                     | (61.5%, 100%) | 18.17            | (13.1, 25.3) | <0.0001 |
|                                                                            |                     |                             | 31 | 31    | 100%                                      |               |                  |              |         |
| Age of mother<br>(years)                                                   | Mother <25          | 28.2%                       | 45 | 481   | 4.7%                                      | (2.9%, 7.7%)  | 1.00             |              |         |
|                                                                            | Mother 25-35        | 59.9%                       | 52 | 1,021 | 3.6%                                      | (2.5%, 5.3%)  | 0.77             | (0.53, 1.12) | 0.17    |
|                                                                            | Mother 35+          | 11.9%                       | 10 | 202   | 3.1%                                      | (1.8%, 5.5%)  | 0.67             | (0.38, 1.18) | 0.16    |
| SEIFA band <sup>3</sup>                                                    | High/middle SEIFA   | 65.4%                       | 61 | 1,115 | 4.7%                                      | (2.9%, 7.7%)  | 1.00             |              |         |
|                                                                            | Low SEIFA           | 34.6%                       | 46 | 589   | 5.1%                                      | (3.6%, 7.2%)  | 1.08             | (0.76, 1.54) | 0.66    |
| Smoking                                                                    | Current non-smoker  | 74.7%                       | 60 | 1,273 | 4.7%                                      | (2.9%, 7.7%)  | 1.00             |              |         |
|                                                                            | Current smoker      | 25.3%                       | 47 | 431   | 5.9%                                      | (5.1%, 6.8%)  | 1.25             | (1.09, 1.44) | 0.0020  |
| Hypertension and/or<br>Pre-eclampsia                                       | No HT/P-Ecl         | 93.2%                       | 95 | 1,588 | 4.7%                                      | (2.9%, 7.7%)  | 1.00             |              |         |
|                                                                            | HT/P-Ecl            | 6.8%                        | 12 | 116   | 8.1%                                      | (4.7%, 14.0%) | 1.73             | (1.01, 2.97) | 0.047   |



**Tables S10 to S16 show the associations between maternal outcomes and predictors of those outcomes**

Table S10: The effect of BMI status at conception and GWG at delivery on the rate of gestational diabetes mellitus in this pregnancy or prior diabetes mellitus

| Predictor                                                | Predictor groupings | Group %<br>BMI <sup>4</sup> | n   | N     | % in group with<br>condition <sup>5</sup> | 95%CI          | IRR <sup>5</sup> | 95%CI        | P-value |
|----------------------------------------------------------|---------------------|-----------------------------|-----|-------|-------------------------------------------|----------------|------------------|--------------|---------|
| Outcome: Gestational diabetes or prior diabetes mellitus |                     |                             |     |       |                                           |                |                  |              |         |
| BMI (kg.m <sup>2</sup> ) at<br>conception <sup>1</sup>   | <18.5               | 3.7%                        | 1   | 64    | 1.4%                                      | (0.2%, 10.4%)  | 0.33             | (0.04, 2.46) | 0.28    |
|                                                          | 18.5-25             | 40.6%                       | 32  | 704   | 4.2%                                      | (2.7%, 6.5%)   | 1.00             |              |         |
|                                                          | 25-30               | 27.0%                       | 47  | 469   | 9.5%                                      | (6.2%, 14.6%)  | 2.25             | (1.46, 3.47) | 0.0002  |
|                                                          | 30-35               | 14.1%                       | 31  | 244   | 11.4%                                     | (7.1%, 18.2%)  | 2.70             | (1.68, 4.33) | <0.0001 |
|                                                          | 35+                 | 14.6%                       | 72  | 254   | 23.3%                                     | (15.6%, 34.8%) | 5.53             | (3.70, 8.25) | <0.0001 |
| Birth GWG versus<br>recommendations<br><sup>1</sup>      | Within              | 43.5%                       | 73  | 754   | 4.2%                                      | (2.7%, 6.5%)   | 1.00             |              |         |
|                                                          | Above               | 43.6%                       | 66  | 757   | 3.3%                                      | (2.4%, 4.5%)   | 0.79             | (0.58, 1.08) | 0.14    |
|                                                          | Below               | 12.9%                       | 44  | 224   | 6.2%                                      | (4.4%, 8.6%)   | 1.47             | (1.05, 2.05) | 0.024   |
| Whether<br>premature                                     | No prematurity      | 95.2%                       | 173 | 1,651 | 4.2%                                      | (2.7%, 6.5%)   | 1.00             |              |         |
|                                                          | Prem: 32-35 weeks   | 3.1%                        | 8   | 53    | 7.0%                                      | (3.7%, 13.3%)  | 1.66             | (0.87, 3.16) | 0.13    |
|                                                          | Prem: <32 weeks     | 1.8%                        | 2   | 31    | 2.7%                                      | (0.7%, 11.1%)  | 0.65             | (0.16, 2.65) | 0.55    |
| Age of mother<br>(years)                                 | Mother <25          | 22.4%                       | 41  | 490   | 4.2%                                      | (2.7%, 6.5%)   | 1.00             |              |         |
|                                                          | Mother 25-35        | 55.2%                       | 101 | 1,035 | 4.4%                                      | (3.1%, 6.2%)   | 1.04             | (0.74, 1.46) | 0.81    |
|                                                          | Mother 35+          | 22.4%                       | 41  | 210   | 7.9%                                      | (5.4%, 11.5%)  | 1.88             | (1.29, 2.74) | 0.0010  |
| SEIFA band <sup>3</sup>                                  | High/middle SEIFA   | 66.7%                       | 122 | 1,132 | 4.2%                                      | (2.7%, 6.5%)   | 1.00             |              |         |
|                                                          | Low SEIFA           | 33.3%                       | 61  | 603   | 3.7%                                      | (2.8%, 4.9%)   | 0.88             | (0.66, 1.16) | 0.36    |
| Smoking                                                  | Current non-smoker  | 74.9%                       | 137 | 1,289 | 4.2%                                      | (2.7%, 6.5%)   | 1.00             |              |         |
|                                                          | Current smoker      | 25.1%                       | 46  | 446   | 4.2%                                      | (3.7%, 4.8%)   | 1.00             | (0.88, 1.14) | 0.96    |
| Hypertension and/or<br>Pre-eclampsia                     | No HT/P-Ecl         | 87.4%                       | 160 | 1,618 | 4.2%                                      | (2.7%, 6.5%)   | 1.00             |              |         |
|                                                          | HT/P-Ecl            | 12.6%                       | 23  | 117   | 6.3%                                      | (4.4%, 9.0%)   | 1.50             | (1.05, 2.14) | 0.025   |

Table S11: The effect of BMI status at conception and GWG at delivery on the rate of maternal hypertension and/or pre-eclampsia during pregnancy

| Predictor                                              | Predictor groupings | Group %<br>BMI <sup>4</sup> | n   | N     | % in group with<br>condition <sup>5</sup> | 95%CI         | IRR <sup>5</sup> | 95%CI        | P-value |
|--------------------------------------------------------|---------------------|-----------------------------|-----|-------|-------------------------------------------|---------------|------------------|--------------|---------|
| Outcome: Hypertension of pregnancy or Pre-eclampsia    |                     |                             |     |       |                                           |               |                  |              |         |
| BMI (kg.m <sup>2</sup> ) at<br>conception <sup>1</sup> | <18.5               | 3.7%                        | 2   | 64    | 4.1%                                      | (0.9%, 18.3%) | 0.99             | (0.22, 4.42) | 0.99    |
|                                                        | 18.5-25             | 40.6%                       | 31  | 704   | 4.1%                                      | (2.3%, 7.3%)  | 1.00             |              |         |
|                                                        | 25-30               | 27.0%                       | 30  | 469   | 5.2%                                      | (3.1%, 8.8%)  | 1.26             | (0.75, 2.12) | 0.38    |
|                                                        | 30-35               | 14.1%                       | 18  | 244   | 5.5%                                      | (3.1%, 9.9%)  | 1.34             | (0.75, 2.38) | 0.32    |
|                                                        | 35+                 | 14.6%                       | 36  | 254   | 10.8%                                     | (6.5%, 18.0%) | 2.62             | (1.58, 4.35) | 0.0002  |
| Birth GWG versus<br>recommendations<br><sup>1</sup>    | Within              | 31.6%                       | 37  | 754   | 4.1%                                      | (2.3%, 7.3%)  | 1.00             |              |         |
|                                                        | Above               | 59.8%                       | 70  | 757   | 8.6%                                      | (5.7%, 12.8%) | 2.07             | (1.39, 3.10) | 0.0004  |
|                                                        | Below               | 8.5%                        | 10  | 224   | 2.9%                                      | (1.4%, 5.7%)  | 0.69             | (0.35, 1.37) | 0.29    |
| DM screening<br>status & result <sup>2</sup>           | GDM excluded        | 55.6%                       | 65  | 972   | 4.1%                                      | (2.3%, 7.3%)  | 1.00             |              |         |
|                                                        | GDM diagnosed       | 19.7%                       | 23  | 183   | 6.1%                                      | (3.8%, 9.9%)  | 1.49             | (0.93, 2.38) | 0.10    |
|                                                        | GDM not screened    | 24.8%                       | 29  | 580   | 3.5%                                      | (2.2%, 5.4%)  | 0.84             | (0.54, 1.31) | 0.44    |
| Whether<br>premature                                   | No prematurity      | 93.2%                       | 109 | 1,651 | 4.1%                                      | (2.3%, 7.3%)  | 1.00             |              |         |
|                                                        | Prem: 32-35 weeks   | 6.0%                        | 7   | 53    | 12.0%                                     | (5.6%, 26.1%) | 2.91             | (1.34, 6.31) | 0.0067  |
|                                                        | Prem: <32 weeks     | 0.9%                        | 1   | 31    | 6.0%                                      | (0.9%, 39.4%) | 1.45             | (0.22, 9.53) | 0.70    |
| Age of mother<br>(years)                               | Mother <25          | 25.6%                       | 30  | 490   | 4.1%                                      | (2.3%, 7.3%)  | 1.00             |              |         |
|                                                        | Mother 25-35        | 63.2%                       | 74  | 1,035 | 4.1%                                      | (2.6%, 6.3%)  | 0.98             | (0.63, 1.53) | 0.94    |
|                                                        | Mother 35+          | 11.1%                       | 13  | 210   | 3.3%                                      | (1.7%, 6.5%)  | 0.81             | (0.41, 1.58) | 0.53    |
| SEIFA band <sup>3</sup>                                | High/middle SEIFA   | 59.8%                       | 70  | 1,132 | 4.1%                                      | (2.3%, 7.3%)  | 1.00             |              |         |
|                                                        | Low SEIFA           | 40.2%                       | 47  | 603   | 4.8%                                      | (3.3%, 7.0%)  | 1.17             | (0.80, 1.70) | 0.42    |
| Smoking                                                | Current non-smoker  | 82.9%                       | 97  | 1,289 | 4.1%                                      | (2.3%, 7.3%)  | 1.00             |              |         |
|                                                        | Current smoker      | 17.1%                       | 20  | 446   | 3.4%                                      | (2.7%, 4.2%)  | 0.82             | (0.66, 1.02) | 0.071   |

Table S12: The effect of BMI status at conception and GWG at delivery on the rate of maternal mental health disorders during pregnancy and delivery period

| Predictor                                                                                            | Predictor groupings | Group %<br>BMI <sup>4</sup> | n   | N     | % in group with<br>condition <sup>5</sup> | 95%CI          | IRR <sup>5</sup> | 95%CI        | P-value |
|------------------------------------------------------------------------------------------------------|---------------------|-----------------------------|-----|-------|-------------------------------------------|----------------|------------------|--------------|---------|
| Outcome: Anxiety, depression, postnatal depression; during pregnancy, post-delivery, or pre-existing |                     |                             |     |       |                                           |                |                  |              |         |
| BMI (kg.m <sup>2</sup> ) at<br>conception <sup>1</sup>                                               | <18.5               | 3.7%                        | 31  | 64    | 39.4%                                     | (30.6%, 50.7%) | 1.32             | (1.02, 1.70) | 0.033   |
|                                                                                                      | 18.5-25             | 40.6%                       | 227 | 704   | 29.9%                                     | (25.3%, 35.3%) | 1.00             |              |         |
|                                                                                                      | 25-30               | 27.0%                       | 162 | 469   | 32.9%                                     | (28.0%, 38.6%) | 1.10             | (0.94, 1.29) | 0.24    |
|                                                                                                      | 30-35               | 14.1%                       | 107 | 244   | 41.5%                                     | (34.8%, 49.6%) | 1.39             | (1.17, 1.66) | 0.0003  |
|                                                                                                      | 35+                 | 14.6%                       | 122 | 254   | 45.2%                                     | (38.1%, 53.6%) | 1.51             | (1.27, 1.79) | <0.0001 |
| Birth GWG versus<br>recommendations<br><sup>1</sup>                                                  | Within              | 43.5%                       | 268 | 754   | 29.9%                                     | (25.3%, 35.3%) | 1.00             |              |         |
|                                                                                                      | Above               | 43.6%                       | 278 | 757   | 31.2%                                     | (27.3%, 35.7%) | 1.05             | (0.92, 1.19) | 0.51    |
|                                                                                                      | Below               | 12.9%                       | 103 | 224   | 33.8%                                     | (28.5%, 40.1%) | 1.13             | (0.96, 1.34) | 0.15    |
| DM screening<br>status & result <sup>2</sup>                                                         | GDM excluded        | 56.0%                       | 346 | 972   | 29.9%                                     | (25.3%, 35.3%) | 1.00             |              |         |
|                                                                                                      | GDM diagnosed       | 10.5%                       | 72  | 183   | 30.7%                                     | (25.0%, 37.6%) | 1.03             | (0.84, 1.26) | 0.80    |
|                                                                                                      | GDM not screened    | 33.4%                       | 231 | 580   | 33.2%                                     | (29.1%, 37.8%) | 1.11             | (0.98, 1.26) | 0.11    |
| Whether<br>premature                                                                                 | No prematurity      | 95.2%                       | 604 | 1,651 | 29.9%                                     | (25.3%, 35.3%) | 1.00             |              |         |
|                                                                                                      | Prem: 32-35 weeks   | 3.1%                        | 27  | 53    | 39.7%                                     | (29.7%, 52.9%) | 1.33             | (0.99, 1.77) | 0.054   |
|                                                                                                      | Prem: <32 weeks     | 1.8%                        | 18  | 31    | 41.2%                                     | (29.6%, 57.3%) | 1.38             | (0.99, 1.92) | 0.056   |
| Age of mother<br>(years)                                                                             | Mother <25          | 33.9%                       | 220 | 490   | 29.9%                                     | (25.3%, 35.3%) | 1.00             |              |         |
|                                                                                                      | Mother 25-35        | 57.0%                       | 370 | 1,035 | 26.1%                                     | (23.0%, 29.7%) | 0.87             | (0.77, 0.99) | 0.038   |
|                                                                                                      | Mother 35+          | 9.1%                        | 59  | 210   | 20.1%                                     | (15.9%, 25.4%) | 0.67             | (0.53, 0.85) | 0.0009  |
| SEIFA band <sup>3</sup>                                                                              | High/middle SEIFA   | 57.6%                       | 374 | 1,132 | 29.9%                                     | (25.3%, 35.3%) | 1.00             |              |         |
|                                                                                                      | Low SEIFA           | 42.4%                       | 275 | 603   | 36.2%                                     | (32.1%, 40.9%) | 1.21             | (1.07, 1.37) | 0.0020  |
| Smoking                                                                                              | Current non-smoker  | 62.6%                       | 406 | 1,289 | 29.9%                                     | (25.3%, 35.3%) | 1.00             |              |         |
|                                                                                                      | Current smoker      | 37.4%                       | 243 | 446   | 36.2%                                     | (34.4%, 38.2%) | 1.21             | (1.15, 1.28) | <0.0001 |
| Hypertension and/or<br>Pre-eclampsia                                                                 | No HT/P-Ecl         | 94.3%                       | 612 | 1,618 | 29.9%                                     | (25.3%, 35.3%) | 1.00             |              |         |
|                                                                                                      | HT/P-Ecl            | 5.7%                        | 37  | 117   | 24.4%                                     | (18.6%, 31.9%) | 0.82             | (0.62, 1.07) | 0.14    |

Table S13: The effect of BMI status at conception and GWG at delivery on the rate of delivery by Caesarean section

| Predictor                                              | Predictor groupings | Group %<br>BMI <sup>4</sup> | n   | N     | % in group with<br>condition <sup>5</sup> | 95%CI          | IRR <sup>5</sup> | 95%CI        | P-value |
|--------------------------------------------------------|---------------------|-----------------------------|-----|-------|-------------------------------------------|----------------|------------------|--------------|---------|
| Outcome: Caesarean section delivery                    |                     |                             |     |       |                                           |                |                  |              |         |
| BMI (kg.m <sup>2</sup> ) at<br>conception <sup>1</sup> | <18.5               | 3.7%                        | 13  | 64    | 16.9%                                     | (10.2%, 27.9%) | 0.64             | (0.39, 1.05) | 0.080   |
|                                                        | 18.5-25             | 40.6%                       | 243 | 704   | 26.5%                                     | (21.9%, 31.9%) | 1.00             |              |         |
|                                                        | 25-30               | 27.0%                       | 175 | 469   | 27.7%                                     | (23.7%, 32.3%) | 1.05             | (0.90, 1.22) | 0.57    |
|                                                        | 30-35               | 14.1%                       | 88  | 244   | 26.9%                                     | (22.2%, 32.7%) | 1.02             | (0.84, 1.23) | 0.86    |
|                                                        | 35+                 | 14.6%                       | 121 | 254   | 33.4%                                     | (28.3%, 39.5%) | 1.26             | (1.07, 1.49) | 0.0065  |
| Birth GWG versus<br>recommendations<br><sup>1</sup>    | Within              | 43.5%                       | 252 | 754   | 26.5%                                     | (21.9%, 31.9%) | 1.00             |              |         |
|                                                        | Above               | 43.6%                       | 313 | 757   | 32.8%                                     | (28.7%, 37.5%) | 1.24             | (1.08, 1.42) | 0.0017  |
|                                                        | Below               | 12.9%                       | 75  | 224   | 25.9%                                     | (21.0%, 31.9%) | 0.98             | (0.79, 1.21) | 0.84    |
| DM screening<br>status & result <sup>2</sup>           | GDM excluded        | 56.0%                       | 346 | 972   | 26.5%                                     | (21.9%, 31.9%) | 1.00             |              |         |
|                                                        | GDM diagnosed       | 10.5%                       | 93  | 183   | 34.8%                                     | (29.3%, 41.3%) | 1.32             | (1.11, 1.56) | 0.0018  |
|                                                        | GDM not screened    | 33.4%                       | 201 | 580   | 26.5%                                     | (23.0%, 30.5%) | 1.00             | (0.87, 1.15) | 0.97    |
| Whether birth<br>premature                             | No prematurity      | 95.2%                       | 591 | 1,651 | 26.5%                                     | (21.9%, 31.9%) | 1.00             |              |         |
|                                                        | Prem: 32-35 weeks   | 3.1%                        | 33  | 53    | 47.0%                                     | (38.0%, 58.3%) | 1.78             | (1.43, 2.20) | <0.0001 |
|                                                        | Prem: <32 weeks     | 1.8%                        | 16  | 31    | 45.2%                                     | (31.7%, 64.4%) | 1.71             | (1.20, 2.43) | 0.0031  |
| Age of mother<br>(years)                               | Mother <25          | 24.4%                       | 156 | 490   | 26.5%                                     | (21.9%, 31.9%) | 1.00             |              |         |
|                                                        | Mother 25-35        | 61.1%                       | 391 | 1,035 | 30.1%                                     | (25.9%, 35.0%) | 1.14             | (0.98, 1.32) | 0.092   |
|                                                        | Mother 35+          | 14.5%                       | 93  | 210   | 33.9%                                     | (27.7%, 41.4%) | 1.28             | (1.05, 1.57) | 0.016   |
| SEIFA band <sup>3</sup>                                | High/middle SEIFA   | 65.8%                       | 421 | 1,132 | 26.5%                                     | (21.9%, 31.9%) | 1.00             |              |         |
|                                                        | Low SEIFA           | 34.2%                       | 219 | 603   | 26.7%                                     | (23.4%, 30.4%) | 1.01             | (0.89, 1.15) | 0.90    |
| Smoking                                                | Current non-smoker  | 78.1%                       | 500 | 1,289 | 26.5%                                     | (21.9%, 31.9%) | 1.00             |              |         |
|                                                        | Current smoker      | 21.9%                       | 140 | 446   | 24.3%                                     | (22.7%, 26.0%) | 0.92             | (0.86, 0.98) | 0.011   |
| Hypertension and/or<br>Pre-eclampsia                   | No HT/P-Ecl         | 91.3%                       | 584 | 1,618 | 26.5%                                     | (21.9%, 31.9%) | 1.00             |              |         |
|                                                        | HT/P-Ecl            | 8.8%                        | 56  | 117   | 30.1%                                     | (24.7%, 36.6%) | 1.14             | (0.93, 1.38) | 0.20    |

Table S14: The effect of BMI status at conception and GWG at delivery on the rate of instrumental delivery

| Predictor                                              | Predictor groupings | Group %<br>BMI <sup>4</sup> | n   | N     | % in group with<br>condition <sup>5</sup> | 95%CI          | IRR <sup>5</sup> | 95%CI        | P-value |
|--------------------------------------------------------|---------------------|-----------------------------|-----|-------|-------------------------------------------|----------------|------------------|--------------|---------|
| Outcome: Instrumental delivery                         |                     |                             |     |       |                                           |                |                  |              |         |
| BMI (kg.m <sup>2</sup> ) at<br>conception <sup>1</sup> | <18.5               | 3.7%                        | 5   | 64    | 9.2%                                      | (3.8%, 22.4%)  | 1.05             | (0.43, 2.57) | 0.91    |
|                                                        | 18.5-25             | 40.6%                       | 62  | 704   | 8.7%                                      | (5.4%, 14.1%)  | 1.00             |              |         |
|                                                        | 25-30               | 27.0%                       | 39  | 469   | 7.9%                                      | (5.4%, 11.5%)  | 0.90             | (0.62, 1.32) | 0.59    |
|                                                        | 30-35               | 14.1%                       | 16  | 244   | 6.4%                                      | (3.8%, 10.7%)  | 0.73             | (0.44, 1.22) | 0.23    |
|                                                        | 35+                 | 14.6%                       | 10  | 254   | 4.1%                                      | (2.1%, 8.0%)   | 0.47             | (0.24, 0.91) | 0.025   |
| Birth GWG versus<br>recommendations<br><sup>1</sup>    | Within              | 43.5%                       | 43  | 754   | 8.7%                                      | (5.4%, 14.1%)  | 1.00             |              |         |
|                                                        | Above               | 43.6%                       | 75  | 757   | 14.6%                                     | (10.0%, 21.5%) | 1.68             | (1.14, 2.46) | 0.0083  |
|                                                        | Below               | 12.9%                       | 14  | 224   | 11.9%                                     | (6.5%, 21.9%)  | 1.37             | (0.75, 2.51) | 0.31    |
| DM screening<br>status & result <sup>2</sup>           | GDM excluded        | 56.0%                       | 86  | 972   | 8.7%                                      | (5.4%, 14.1%)  | 1.00             |              |         |
|                                                        | GDM diagnosed       | 10.5%                       | 7   | 183   | 5.1%                                      | (2.3%, 11.1%)  | 0.58             | (0.27, 1.27) | 0.17    |
|                                                        | GDM not screened    | 33.4%                       | 39  | 580   | 7.4%                                      | (5.1%, 10.7%)  | 0.85             | (0.59, 1.22) | 0.38    |
| Whether<br>premature                                   | No prematurity      | 95.2%                       | 129 | 1,651 | 8.7%                                      | (5.4%, 14.1%)  | 1.00             |              |         |
|                                                        | Prem: 32-35 weeks   | 3.1%                        | 2   | 53    | 4.5%                                      | (1.2%, 17.0%)  | 0.52             | (0.14, 1.94) | 0.33    |
|                                                        | Prem: <32 weeks     | 1.8%                        | 1   | 31    | 6.4%                                      | (0.9%, 45.3%)  | 0.73             | (0.10, 5.18) | 0.75    |
| Age of mother<br>(years)                               | Mother <25          | 34.1%                       | 45  | 490   | 8.7%                                      | (5.4%, 14.1%)  | 1.00             |              |         |
|                                                        | Mother 25-35        | 59.1%                       | 78  | 1,035 | 6.6%                                      | (4.7%, 9.3%)   | 0.75             | (0.53, 1.07) | 0.11    |
|                                                        | Mother 35+          | 6.8%                        | 9   | 210   | 4.2%                                      | (2.1%, 8.5%)   | 0.48             | (0.24, 0.97) | 0.040   |
| SEIFA band <sup>3</sup>                                | High/middle SEIFA   | 67.4%                       | 89  | 1,132 | 8.7%                                      | (5.4%, 14.1%)  | 1.00             |              |         |
|                                                        | Low SEIFA           | 32.6%                       | 43  | 603   | 8.6%                                      | (6.0%, 12.3%)  | 0.98             | (0.68, 1.41) | 0.93    |
| Smoking                                                | Current non-smoker  | 87.1%                       | 115 | 1,289 | 8.7%                                      | (5.4%, 14.1%)  | 1.00             |              |         |
|                                                        | Current smoker      | 12.9%                       | 17  | 446   | 6.0%                                      | (4.8%, 7.5%)   | 0.69             | (0.55, 0.85) | 0.0007  |
| Hypertension and/or<br>Pre-eclampsia                   | No HT/P-Ecl         | 90.9%                       | 120 | 1,618 | 8.7%                                      | (5.4%, 14.1%)  | 1.00             |              |         |
|                                                        | HT/P-Ecl            | 9.1%                        | 12  | 117   | 11.9%                                     | (6.7%, 21.1%)  | 1.37             | (0.77, 2.42) | 0.28    |

Table S15: The effect of BMI status at conception and GWG at delivery on the rate of Moderate-to-severe genital trauma during delivery

| Predictor                                                  | Predictor groupings | Group %<br>BMI <sup>4</sup> | n   | N     | % in group with<br>condition <sup>5</sup> | 95%CI          | IRR <sup>5</sup> | 95%CI        | P-value |
|------------------------------------------------------------|---------------------|-----------------------------|-----|-------|-------------------------------------------|----------------|------------------|--------------|---------|
| Outcome: Moderate-to-severe genital trauma during delivery |                     |                             |     |       |                                           |                |                  |              |         |
| BMI (kg.m <sup>2</sup> ) at<br>conception <sup>1</sup>     | <18.5               | 3.7%                        | 23  | 64    | 49.4%                                     | (35.3%, 69.2%) | 1.07             | (0.77, 1.50) | 0.69    |
|                                                            | 18.5-25             | 40.6%                       | 247 | 704   | 46.1%                                     | (38.9%, 54.7%) | 1.00             |              |         |
|                                                            | 25-30               | 27.0%                       | 149 | 469   | 41.1%                                     | (34.9%, 48.4%) | 0.89             | (0.76, 1.05) | 0.17    |
|                                                            | 30-35               | 14.1%                       | 80  | 244   | 43.3%                                     | (35.2%, 53.2%) | 0.94             | (0.76, 1.15) | 0.55    |
|                                                            | 35+                 | 14.6%                       | 66  | 254   | 36.4%                                     | (28.7%, 46.1%) | 0.79             | (0.62, 1.00) | 0.050   |
| Birth GWG versus<br>recommendations<br><sup>1</sup>        | Within              | 43.5%                       | 236 | 754   | 46.1%                                     | (38.9%, 54.7%) | 1.00             |              |         |
|                                                            | Above               | 43.6%                       | 266 | 757   | 49.3%                                     | (42.6%, 56.9%) | 1.07             | (0.92, 1.23) | 0.37    |
|                                                            | Below               | 12.9%                       | 63  | 224   | 44.0%                                     | (34.8%, 55.5%) | 0.95             | (0.75, 1.20) | 0.69    |
| DM screening<br>status & result <sup>2</sup>               | GDM excluded        | 56.0%                       | 357 | 972   | 46.1%                                     | (38.9%, 54.7%) | 1.00             |              |         |
|                                                            | GDM diagnosed       | 10.5%                       | 46  | 183   | 36.5%                                     | (27.8%, 47.7%) | 0.79             | (0.60, 1.03) | 0.087   |
|                                                            | GDM not screened    | 33.4%                       | 162 | 580   | 37.0%                                     | (31.8%, 43.1%) | 0.80             | (0.69, 0.94) | 0.0049  |
| Whether<br>premature                                       | No prematurity      | 95.2%                       | 556 | 1,651 | 46.1%                                     | (38.9%, 54.7%) | 1.00             |              |         |
|                                                            | Prem: 32-35 weeks   | 3.1%                        | 9   | 53    | 24.1%                                     | (13.3%, 43.4%) | 0.52             | (0.29, 0.94) | 0.031   |
|                                                            | Prem: <32 weeks     | 1.8%                        | 0   | 31    | 0.0%                                      | (0.0%, 0.0%)   | 0.00             | (0.00, 0.00) | <0.0001 |
| Age of mother<br>(years)                                   | Mother <25          | 32.0%                       | 181 | 490   | 46.1%                                     | (38.9%, 54.7%) | 1.00             |              |         |
|                                                            | Mother 25-35        | 60.0%                       | 339 | 1,035 | 38.2%                                     | (33.1%, 44.1%) | 0.83             | (0.72, 0.96) | 0.010   |
|                                                            | Mother 35+          | 8.0%                        | 45  | 210   | 26.8%                                     | (20.3%, 35.4%) | 0.58             | (0.44, 0.77) | 0.0001  |
| SEIFA band <sup>3</sup>                                    | High/middle SEIFA   | 67.4%                       | 381 | 1,132 | 46.1%                                     | (38.9%, 54.7%) | 1.00             |              |         |
|                                                            | Low SEIFA           | 32.6%                       | 184 | 603   | 43.6%                                     | (37.7%, 50.4%) | 0.94             | (0.82, 1.09) | 0.44    |
| Smoking                                                    | Current non-smoker  | 81.2%                       | 459 | 1,289 | 46.1%                                     | (38.9%, 54.7%) | 1.00             |              |         |
|                                                            | Current smoker      | 18.8%                       | 106 | 446   | 39.0%                                     | (36.1%, 42.1%) | 0.84             | (0.78, 0.91) | <0.0001 |
| Hypertension and/or<br>Pre-eclampsia                       | No HT/P-Ecl         | 93.6%                       | 529 | 1,618 | 46.1%                                     | (38.9%, 54.7%) | 1.00             |              |         |
|                                                            | HT/P-Ecl            | 6.4%                        | 36  | 117   | 43.2%                                     | (32.8%, 56.9%) | 0.94             | (0.71, 1.23) | 0.64    |

Table S16: The effect of BMI status at conception and GWG at delivery on the rate of post-partum haemorrhage

| Predictor                                              | Predictor groupings | Group %<br>BMI <sup>4</sup> | n   | N     | % in group with<br>condition <sup>5</sup> | 95%CI          | IRR <sup>5</sup> | 95%CI        | P-value |
|--------------------------------------------------------|---------------------|-----------------------------|-----|-------|-------------------------------------------|----------------|------------------|--------------|---------|
| Outcome: Post-partum haemorrhage                       |                     |                             |     |       |                                           |                |                  |              |         |
| BMI (kg.m <sup>2</sup> ) at<br>conception <sup>1</sup> | <18.5               | 3.7%                        | 12  | 64    | 14.4%                                     | (8.4%, 24.5%)  | 1.07             | (0.63, 1.83) | 0.79    |
|                                                        | 18.5-25             | 40.6%                       | 138 | 704   | 13.4%                                     | (10.1%, 17.7%) | 1.00             |              |         |
|                                                        | 25-30               | 27.0%                       | 95  | 469   | 13.3%                                     | (10.5%, 16.9%) | 1.00             | (0.79, 1.26) | 0.97    |
|                                                        | 30-35               | 14.1%                       | 67  | 244   | 18.2%                                     | (14.1%, 23.4%) | 1.36             | (1.05, 1.74) | 0.019   |
|                                                        | 35+                 | 14.6%                       | 60  | 254   | 15.0%                                     | (11.4%, 19.8%) | 1.12             | (0.85, 1.48) | 0.42    |
| Birth GWG versus<br>recommendations<br><sup>1</sup>    | Within              | 43.5%                       | 137 | 754   | 13.4%                                     | (10.1%, 17.7%) | 1.00             |              |         |
|                                                        | Above               | 43.6%                       | 187 | 757   | 18.3%                                     | (14.9%, 22.4%) | 1.36             | (1.12, 1.67) | 0.0025  |
|                                                        | Below               | 12.9%                       | 48  | 224   | 15.2%                                     | (11.3%, 20.4%) | 1.13             | (0.84, 1.52) | 0.42    |
| DM screening<br>status & result <sup>2</sup>           | GDM excluded        | 56.0%                       | 216 | 972   | 13.4%                                     | (10.1%, 17.7%) | 1.00             |              |         |
|                                                        | GDM diagnosed       | 10.5%                       | 47  | 183   | 14.6%                                     | (11.0%, 19.4%) | 1.09             | (0.82, 1.45) | 0.54    |
|                                                        | GDM not screened    | 33.4%                       | 109 | 580   | 11.8%                                     | (9.5%, 14.5%)  | 0.88             | (0.71, 1.08) | 0.22    |
| Whether<br>premature                                   | No prematurity      | 95.2%                       | 350 | 1,651 | 13.4%                                     | (10.1%, 17.7%) | 1.00             |              |         |
|                                                        | Prem: 32-35 weeks   | 3.1%                        | 14  | 53    | 17.8%                                     | (11.3%, 28.0%) | 1.33             | (0.84, 2.09) | 0.23    |
|                                                        | Prem: <32 weeks     | 1.8%                        | 8   | 31    | 19.1%                                     | (10.1%, 36.1%) | 1.42             | (0.75, 2.70) | 0.28    |
| Age of mother<br>(years)                               | Mother <25          | 21.8%                       | 81  | 490   | 13.4%                                     | (10.1%, 17.7%) | 1.00             |              |         |
|                                                        | Mother 25-35        | 61.8%                       | 230 | 1,035 | 18.0%                                     | (14.3%, 22.7%) | 1.35             | (1.07, 1.70) | 0.012   |
|                                                        | Mother 35+          | 16.4%                       | 61  | 210   | 23.0%                                     | (17.1%, 31.1%) | 1.72             | (1.27, 2.32) | 0.0004  |
| SEIFA band <sup>3</sup>                                | High/middle SEIFA   | 65.6%                       | 244 | 1,132 | 13.4%                                     | (10.1%, 17.7%) | 1.00             |              |         |
|                                                        | Low SEIFA           | 34.4%                       | 128 | 603   | 13.6%                                     | (11.2%, 16.5%) | 1.02             | (0.84, 1.23) | 0.87    |
| Smoking                                                | Current non-smoker  | 76.1%                       | 283 | 1,289 | 13.4%                                     | (10.1%, 17.7%) | 1.00             |              |         |
|                                                        | Current smoker      | 23.9%                       | 89  | 446   | 13.1%                                     | (11.9%, 14.3%) | 0.97             | (0.89, 1.07) | 0.59    |
| Hypertension and/or<br>Pre-eclampsia                   | No HT/P-Ecl         | 93.3%                       | 347 | 1,618 | 13.4%                                     | (10.1%, 17.7%) | 1.00             |              |         |
|                                                        | HT/P-Ecl            | 6.7%                        | 25  | 117   | 12.0%                                     | (8.3%, 17.2%)  | 0.89             | (0.62, 1.28) | 0.54    |

**Tables S17 to S18 show the associations between outcomes for the babies and predictors of those outcomes**

Table S17: The effect of BMI status at conception and GWG at delivery on the rate of stillbirth

| Predictor                                              | Predictor groupings | Group %<br>BMI <sup>4</sup> | n  | N     | % in group with<br>condition <sup>5</sup> | 95%CI          | IRR <sup>5</sup> | 95%CI        | P-value |
|--------------------------------------------------------|---------------------|-----------------------------|----|-------|-------------------------------------------|----------------|------------------|--------------|---------|
| Outcome: Stillbirth                                    |                     |                             |    |       |                                           |                |                  |              |         |
| BMI (kg.m <sup>2</sup> ) at<br>conception <sup>1</sup> | <18.5               | 3.7%                        | 1  | 64    | 0.10%                                     | (0.02%, 0.45%) | 0.94             | (0.21, 4.19) | 0.93    |
|                                                        | 18.5-25             | 40.6%                       | 6  | 704   | 0.11%                                     | (0.01%, 0.85%) | 1.00             |              |         |
|                                                        | 25-30               | 27.0%                       | 2  | 469   | 0.14%                                     | (0.03%, 0.66%) | 1.28             | (0.26, 6.19) | 0.76    |
|                                                        | 30-35               | 14.1%                       | 3  | 244   | 0.14%                                     | (0.05%, 0.42%) | 1.33             | (0.45, 3.92) | 0.61    |
|                                                        | 35+                 | 14.6%                       | 1  | 254   | 0.07%                                     | (0.02%, 0.31%) | 0.68             | (0.16, 2.92) | 0.61    |
| Birth GWG versus<br>recommendations <sup>1</sup>       | Within              | 43.5%                       | 12 | 754   | 0.11%                                     | (0.01%, 0.85%) | 1.00             |              |         |
|                                                        | Above               | 43.6%                       | 1  | 757   | 0.03%                                     | (0.01%, 0.18%) | 0.32             | (0.06, 1.68) | 0.18    |
|                                                        | Below               | 12.9%                       | 0  | 224   | 0.00%                                     | (0.00%, 0.00%) | 0.00             | (0.00, 0.00) | <0.0001 |
| DM screening<br>status & result <sup>2</sup>           | GDM excluded        | 56.0%                       | 2  | 972   | 0.11%                                     | (0.01%, 0.85%) | 1.00             |              |         |
|                                                        | GDM diagnosed       | 10.5%                       | 0  | 183   | 0.05%                                     | (0.02%, 0.13%) | 0.46             | (0.18, 1.17) | 0.10    |
|                                                        | GDM not screened    | 33.4%                       | 11 | 580   | 0.00%                                     | (0.00%, 0.00%) | 0.00             | (0.00, 0.00) | <0.0001 |
| Whether premature                                      | No prematurity      | 95.2%                       | 2  | 1,651 | 0.11%                                     | (0.01%, 0.85%) | 1.00             |              |         |
|                                                        | Prem: 32-35 weeks   | 3.1%                        | 0  | 53    | 0.00%                                     | (0.00%, 0.00%) | 0.00             | (0.00, 0.00) | <0.0001 |
|                                                        | Prem: <32 weeks     | 1.8%                        | 11 | 31    | 24.8%                                     | (4.6%, 100.0%) | 230.6            | (42.7, 1245) | <0.0001 |
| Age of mother<br>(years)                               | Mother <25          | 28.2%                       | 3  | 490   | 0.11%                                     | (0.01%, 0.85%) | 1.00             |              |         |
|                                                        | Mother 25-35        | 59.7%                       | 7  | 1,035 | 0.16%                                     | (0.05%, 0.50%) | 1.51             | (0.49, 4.64) | 0.47    |
|                                                        | Mother 35+          | 12.1%                       | 3  | 210   | 0.20%                                     | (0.05%, 0.83%) | 1.85             | (0.44, 7.76) | 0.40    |
| SEIFA band <sup>3</sup>                                | High/middle SEIFA   | 65.2%                       | 7  | 1,132 | 0.11%                                     | (0.01%, 0.85%) | 1.00             |              |         |
|                                                        | Low SEIFA           | 34.8%                       | 6  | 603   | 0.18%                                     | (0.07%, 0.48%) | 1.65             | (0.61, 4.44) | 0.33    |
| Smoking                                                | Current non-smoker  | 74.3%                       | 8  | 1,289 | 0.11%                                     | (0.01%, 0.85%) | 1.00             |              |         |
|                                                        | Current smoker      | 25.7%                       | 5  | 446   | 0.11%                                     | (0.08%, 0.15%) | 1.00             | (0.71, 1.40) | 0.999   |
| Hypertension and/or<br>Pre-eclampsia                   | No HT/P-Ecl         | 93.3%                       | 13 | 1,618 | 0.11%                                     | (0.01%, 0.85%) | 1.00             |              |         |
|                                                        | HT/P-Ecl            | 6.7%                        | 0  | 117   | 0.00%                                     | (0.00%, 0.00%) | 0.00             | (0.00, 0.00) | <0.0001 |



Table S18: The effect of BMI status at conception and GWG at delivery on the rate of prematurity before 32 weeks

| Predictor                                           | Predictor groupings | Group % BMI <sup>4</sup> | n  | N     | % in group with condition <sup>5</sup> | 95%CI          | IRR <sup>5</sup> | 95%CI        | P-value |
|-----------------------------------------------------|---------------------|--------------------------|----|-------|----------------------------------------|----------------|------------------|--------------|---------|
| Outcome: Prematurity before 32 weeks                |                     |                          |    |       |                                        |                |                  |              |         |
| BMI (kg.m <sup>2</sup> ) at conception <sup>1</sup> | <18.5               | 3.7%                     | 3  | 64    | 4.61%                                  | (1.25%, 16.9%) | 2.01             | (0.54, 7.38) | 0.30    |
|                                                     | 18.5-25             | 40.6%                    | 13 | 704   | 2.30%                                  | (0.80%, 6.62%) | 1.00             |              |         |
|                                                     | 25-30               | 27.0%                    | 7  | 469   | 2.14%                                  | (0.83%, 5.49%) | 0.93             | (0.36, 2.39) | 0.88    |
|                                                     | 30-35               | 14.1%                    | 5  | 244   | 2.97%                                  | (1.05%, 8.38%) | 1.29             | (0.46, 3.65) | 0.63    |
|                                                     | 35+                 | 14.6%                    | 3  | 254   | 1.45%                                  | (0.39%, 5.45%) | 0.63             | (0.17, 2.37) | 0.50    |
| Birth GWG versus recommendations <sup>1</sup>       | Within              | 43.5%                    | 25 | 754   | 2.30%                                  | (0.80%, 6.62%) | 1.00             |              |         |
|                                                     | Above               | 43.6%                    | 2  | 757   | 0.19%                                  | (0.04%, 0.79%) | 0.08             | (0.02, 0.34) | 0.0006  |
|                                                     | Below               | 12.9%                    | 4  | 224   | 0.96%                                  | (0.33%, 2.77%) | 0.42             | (0.15, 1.21) | 0.11    |
| Age of mother (years)                               | Mother <25          | 28.2%                    | 9  | 490   | 2.30%                                  | (0.80%, 6.62%) | 1.00             |              |         |
|                                                     | Mother 25-35        | 59.7%                    | 14 | 1,035 | 2.06%                                  | (0.87%, 4.85%) | 0.90             | (0.38, 2.11) | 0.80    |
|                                                     | Mother 35+          | 12.1%                    | 8  | 210   | 5.89%                                  | (2.11%, 16.5%) | 2.56             | (0.92, 7.17) | 0.073   |
| SEIFA band <sup>3</sup>                             | High/middle SEIFA   | 65.2%                    | 17 | 1,132 | 2.30%                                  | (0.80%, 6.62%) | 1.00             |              |         |
|                                                     | Low SEIFA           | 34.8%                    | 14 | 603   | 3.38%                                  | (1.70%, 6.69%) | 1.47             | (0.74, 2.91) | 0.27    |
| Smoking                                             | Current non-smoker  | 74.3%                    | 16 | 1,289 | 2.30%                                  | (0.80%, 6.62%) | 1.00             |              |         |
|                                                     | Current smoker      | 25.7%                    | 15 | 446   | 3.50%                                  | (2.60%, 4.73%) | 1.52             | (1.13, 2.06) | 0.0057  |
| Hypertension and/or Pre-eclampsia                   | No HT/P-Ecl         | 93.3%                    | 30 | 1,618 | 2.30%                                  | (0.80%, 6.62%) | 1.00             |              |         |
|                                                     | HT/P-Ecl            | 6.7%                     | 1  | 117   | 1.51%                                  | (0.22%, 10.6%) | 0.66             | (0.09, 4.60) | 0.67    |

There is extreme confounding between prematurity and lack of GDM screening: early prematurity occurs before GDM screening is completed.

Table S19: The effect of BMI status at conception and GWG at delivery on the rate of immediate admission to the Special Care Nursery

| Predictor                                                | Predictor groupings | Group %<br>BMI <sup>4</sup> | n   | N     | % in group with<br>condition <sup>5</sup> | 95%CI          | IRR <sup>5</sup> | 95%CI        | P-value |
|----------------------------------------------------------|---------------------|-----------------------------|-----|-------|-------------------------------------------|----------------|------------------|--------------|---------|
| Outcome: Immediate admission to the Special Care Nursery |                     |                             |     |       |                                           |                |                  |              |         |
| BMI (kg.m <sup>2</sup> ) at<br>conception <sup>1</sup>   | <18.5               | 3.7%                        | 11  | 64    | 13.5%                                     | (7.8%, 23.2%)  | 1.00             | (0.58, 1.73) | 0.99    |
|                                                          | 18.5-25             | 40.6%                       | 104 | 704   | 13.4%                                     | (9.9%, 18.1%)  | 1.00             |              |         |
|                                                          | 25-30               | 27.0%                       | 77  | 469   | 15.1%                                     | (11.6%, 19.7%) | 1.13             | (0.87, 1.47) | 0.36    |
|                                                          | 30-35               | 14.1%                       | 30  | 244   | 11.3%                                     | (7.8%, 16.4%)  | 0.84             | (0.58, 1.23) | 0.37    |
|                                                          | 35+                 | 14.6%                       | 43  | 254   | 13.0%                                     | (9.3%, 18.2%)  | 0.97             | (0.69, 1.36) | 0.87    |
| Birth GWG versus<br>recommendations<br><sup>1</sup>      | Within              | 43.5%                       | 123 | 754   | 13.4%                                     | (9.9%, 18.1%)  | 1.00             |              |         |
|                                                          | Above               | 43.6%                       | 102 | 757   | 11.3%                                     | (8.9%, 14.4%)  | 0.85             | (0.66, 1.08) | 0.17    |
|                                                          | Below               | 12.9%                       | 40  | 224   | 14.4%                                     | (10.3%, 20.0%) | 1.07             | (0.77, 1.49) | 0.68    |
| DM screening<br>status & result <sup>2</sup>             | GDM excluded        | 56.0%                       | 132 | 972   | 13.4%                                     | (9.9%, 18.1%)  | 1.00             |              |         |
|                                                          | GDM diagnosed       | 10.5%                       | 49  | 183   | 23.5%                                     | (17.4%, 31.9%) | 1.76             | (1.30, 2.38) | 0.0003  |
|                                                          | GDM not screened    | 33.4%                       | 84  | 580   | 13.3%                                     | (10.4%, 17.1%) | 0.99             | (0.77, 1.27) | 0.95    |
| Whether birth<br>premature                               | No prematurity      | 95.2%                       | 220 | 1,651 | 13.4%                                     | (9.9%, 18.1%)  | 1.00             |              |         |
|                                                          | Prem: 32-35 weeks   | 3.1%                        | 35  | 53    | 58.9%                                     | (45.6%, 76.0%) | 4.39             | (3.41, 5.67) | <0.0001 |
|                                                          | Prem: <32 weeks     | 1.8%                        | 10  | 31    | 29.9%                                     | (17.0%, 52.5%) | 2.23             | (1.27, 3.92) | 0.0053  |
| Age of mother<br>(years)                                 | Mother <25          | 28.2%                       | 85  | 490   | 13.4%                                     | (9.9%, 18.1%)  | 1.00             |              |         |
|                                                          | Mother 25-35        | 59.7%                       | 140 | 1,035 | 11.3%                                     | (8.9%, 14.5%)  | 0.85             | (0.66, 1.08) | 0.18    |
|                                                          | Mother 35+          | 12.1%                       | 40  | 210   | 14.0%                                     | (10.0%, 19.5%) | 1.04             | (0.74, 1.46) | 0.81    |
| SEIFA band <sup>3</sup>                                  | High/middle SEIFA   | 65.2%                       | 165 | 1,132 | 13.4%                                     | (9.9%, 18.1%)  | 1.00             |              |         |
|                                                          | Low SEIFA           | 34.8%                       | 100 | 603   | 14.5%                                     | (11.5%, 18.2%) | 1.08             | (0.86, 1.36) | 0.51    |
| Smoking                                                  | Current non-smoker  | 74.3%                       | 180 | 1,289 | 13.4%                                     | (9.9%, 18.1%)  | 1.00             |              |         |
|                                                          | Current smoker      | 25.7%                       | 85  | 446   | 14.5%                                     | (13.1%, 16.0%) | 1.08             | (0.98, 1.19) | 0.12    |
| Hypertension and/or<br>Pre-eclampsia                     | No HT/P-Ecl         | 93.3%                       | 237 | 1,618 | 13.4%                                     | (9.9%, 18.1%)  | 1.00             |              |         |
|                                                          | HT/P-Ecl            | 6.7%                        | 28  | 117   | 19.6%                                     | (13.9%, 27.7%) | 1.46             | (1.04, 2.06) | 0.029   |

Table S20: The effect of BMI status at conception and GWG at delivery on the rate of immediate admission to the Neonatal Intensive Care Unit

| Predictor                                                        | Predictor groupings | Group %<br>BMI <sup>4</sup> | n  | N     | % in group with<br>condition <sup>5</sup> | 95%CI          | IRR <sup>5</sup> | 95%CI        | P-value |
|------------------------------------------------------------------|---------------------|-----------------------------|----|-------|-------------------------------------------|----------------|------------------|--------------|---------|
| Outcome: Immediate admission to the Neonatal Intensive Care Unit |                     |                             |    |       |                                           |                |                  |              |         |
| BMI (kg.m <sup>2</sup> ) at<br>conception <sup>1</sup>           | <18.5               | 3.7%                        | 4  | 64    | 0.6%                                      | (0.3%, 1.4%)   | 0.92             | (0.41, 2.03) | 0.83    |
|                                                                  | 18.5-25             | 40.6%                       | 24 | 704   | 0.7%                                      | (0.3%, 1.7%)   | 1.00             |              |         |
|                                                                  | 25-30               | 27.0%                       | 10 | 469   | 0.5%                                      | (0.3%, 1.0%)   | 0.75             | (0.40, 1.40) | 0.36    |
|                                                                  | 30-35               | 14.1%                       | 7  | 244   | 0.8%                                      | (0.3%, 1.9%)   | 1.10             | (0.46, 2.64) | 0.84    |
|                                                                  | 35+                 | 14.6%                       | 12 | 254   | 1.1%                                      | (0.7%, 1.8%)   | 1.54             | (0.92, 2.58) | 0.097   |
| Birth GWG versus<br>recommendations<br><sup>1</sup>              | Within              | 43.5%                       | 27 | 754   | 0.7%                                      | (0.3%, 1.7%)   | 1.00             |              |         |
|                                                                  | Above               | 43.6%                       | 19 | 757   | 0.8%                                      | (0.5%, 1.4%)   | 1.18             | (0.70, 1.99) | 0.53    |
|                                                                  | Below               | 12.9%                       | 11 | 224   | 1.5%                                      | (0.9%, 2.4%)   | 2.05             | (1.24, 3.41) | 0.0053  |
| DM screening<br>status & result <sup>2</sup>                     | GDM excluded        | 56.0%                       | 23 | 972   | 0.7%                                      | (0.3%, 1.7%)   | 1.00             |              |         |
|                                                                  | GDM diagnosed       | 10.5%                       | 8  | 183   | 1.0%                                      | (0.5%, 2.0%)   | 1.42             | (0.72, 2.82) | 0.31    |
|                                                                  | GDM not screened    | 33.4%                       | 26 | 580   | 0.9%                                      | (0.5%, 1.6%)   | 1.30             | (0.75, 2.25) | 0.34    |
| Whether<br>premature                                             | No prematurity      | 95.2%                       | 18 | 1,651 | 0.7%                                      | (0.3%, 1.7%)   | 1.00             |              |         |
|                                                                  | Prem: 32-35 weeks   | 3.1%                        | 25 | 53    | 32.5%                                     | (18.7%, 56.6%) | 45.96            | (26.4, 79.9) | <0.0001 |
|                                                                  | Prem: <32 weeks     | 1.8%                        | 14 | 31    | 29.1%                                     | (14.1%, 60.0%) | 41.08            | (19.9, 84.7) | <0.0001 |
| Age of mother<br>(years)                                         | Mother <25          | 28.2%                       | 17 | 490   | 0.7%                                      | (0.3%, 1.7%)   | 1.00             |              |         |
|                                                                  | Mother 25-35        | 59.7%                       | 30 | 1,035 | 0.7%                                      | (0.4%, 1.3%)   | 1.04             | (0.61, 1.77) | 0.90    |
|                                                                  | Mother 35+          | 12.1%                       | 10 | 210   | 0.9%                                      | (0.4%, 1.9%)   | 1.26             | (0.60, 2.63) | 0.54    |
| SEIFA band <sup>3</sup>                                          | High/middle SEIFA   | 65.2%                       | 34 | 1,132 | 0.7%                                      | (0.3%, 1.7%)   | 1.00             |              |         |
|                                                                  | Low SEIFA           | 34.8%                       | 23 | 603   | 0.8%                                      | (0.5%, 1.2%)   | 1.09             | (0.69, 1.72) | 0.73    |
| Smoking                                                          | Current non-smoker  | 74.3%                       | 37 | 1,289 | 0.7%                                      | (0.3%, 1.7%)   | 1.00             |              |         |
|                                                                  | Current smoker      | 25.7%                       | 20 | 446   | 0.7%                                      | (0.5%, 0.9%)   | 0.96             | (0.77, 1.22) | 0.76    |
| Hypertension and/or<br>Pre-eclampsia                             | No HT/P-Ecl         | 93.3%                       | 53 | 1,618 | 0.7%                                      | (0.3%, 1.7%)   | 1.00             |              |         |
|                                                                  | HT/P-Ecl            | 6.7%                        | 4  | 117   | 0.5%                                      | (0.2%, 1.3%)   | 0.77             | (0.33, 1.81) | 0.55    |

Table S21: The effect of BMI status at conception and GWG at delivery on the rate of neonatal hypoglycaemia

| Predictor                                              | Predictor groupings | Group %<br>BMI <sup>4</sup> | n  | N     | % in group with<br>condition <sup>5</sup> | 95%CI           | IRR <sup>5</sup> | 95%CI         | P-value |
|--------------------------------------------------------|---------------------|-----------------------------|----|-------|-------------------------------------------|-----------------|------------------|---------------|---------|
| Outcome: Neonatal hypoglycaemia                        |                     |                             |    |       |                                           |                 |                  |               |         |
| BMI (kg.m <sup>2</sup> ) at<br>conception <sup>1</sup> | <18.5               | 3.7%                        | 0  | 64    | 0.00%                                     | (0.00%, 0.00%)  | 0.00             | (0.00, 0.00)  | <0.0001 |
|                                                        | 18.5-25             | 40.6%                       | 19 | 704   | 1.42%                                     | (0.73%, 2.78%)  | 1.00             |               |         |
|                                                        | 25-30               | 27.0%                       | 23 | 469   | 2.29%                                     | (1.27%, 4.14%)  | 1.61             | (0.89, 2.91)  | 0.12    |
|                                                        | 30-35               | 14.1%                       | 14 | 244   | 2.38%                                     | (1.15%, 4.90%)  | 1.67             | (0.81, 3.44)  | 0.17    |
|                                                        | 35+                 | 14.6%                       | 19 | 254   | 2.14%                                     | (1.14%, 4.02%)  | 1.50             | (0.80, 2.82)  | 0.21    |
| Birth GWG versus<br>recommendations<br><sup>1</sup>    | Within              | 43.5%                       | 31 | 754   | 1.42%                                     | (0.73%, 2.78%)  | 1.00             |               |         |
|                                                        | Above               | 43.6%                       | 28 | 757   | 1.34%                                     | (0.80%, 2.26%)  | 0.94             | (0.56, 1.59)  | 0.82    |
|                                                        | Below               | 12.9%                       | 16 | 224   | 2.16%                                     | (1.17%, 3.99%)  | 1.52             | (0.82, 2.80)  | 0.19    |
| DM screening<br>status & result <sup>2</sup>           | GDM excluded        | 56.0%                       | 23 | 972   | 1.42%                                     | (0.73%, 2.78%)  | 1.00             |               |         |
|                                                        | GDM diagnosed       | 10.5%                       | 31 | 183   | 8.44%                                     | (4.83%, 14.74%) | 5.93             | (3.39, 10.35) | <0.0001 |
|                                                        | GDM not screened    | 33.4%                       | 21 | 580   | 2.19%                                     | (1.20%, 4.00%)  | 1.54             | (0.84, 2.81)  | 0.16    |
| Whether<br>premature                                   | No prematurity      | 95.2%                       | 65 | 1,651 | 1.42%                                     | (0.73%, 2.78%)  | 1.00             |               |         |
|                                                        | Prem: 32-35 weeks   | 3.1%                        | 8  | 53    | 5.38%                                     | (2.69%, 10.78%) | 3.78             | (1.89, 7.57)  | 0.0002  |
|                                                        | Prem: <32 weeks     | 1.8%                        | 2  | 31    | 2.73%                                     | (0.65%, 11.36%) | 1.91             | (0.46, 7.98)  | 0.37    |
| Age of mother<br>(years)                               | Mother <25          | 28.2%                       | 19 | 490   | 1.42%                                     | (0.73%, 2.78%)  | 1.00             |               |         |
|                                                        | Mother 25-35        | 59.7%                       | 48 | 1,035 | 1.67%                                     | (1.01%, 2.77%)  | 1.17             | (0.71, 1.94)  | 0.53    |
|                                                        | Mother 35+          | 12.1%                       | 8  | 210   | 0.92%                                     | (0.39%, 2.19%)  | 0.65             | (0.27, 1.54)  | 0.33    |
| SEIFA band <sup>3</sup>                                | High/middle SEIFA   | 65.2%                       | 46 | 1,132 | 1.42%                                     | (0.73%, 2.78%)  | 1.00             |               |         |
|                                                        | Low SEIFA           | 34.8%                       | 29 | 603   | 1.64%                                     | (1.03%, 2.63%)  | 1.16             | (0.72, 1.85)  | 0.55    |
| Smoking                                                | Current non-smoker  | 74.3%                       | 53 | 1,289 | 1.42%                                     | (0.73%, 2.78%)  | 1.00             |               |         |
|                                                        | Current smoker      | 25.7%                       | 22 | 446   | 1.49%                                     | (1.20%, 1.84%)  | 1.04             | (0.84, 1.29)  | 0.70    |
| Hypertension and/or<br>Pre-eclampsia                   | No HT/P-Ecl         | 93.3%                       | 66 | 1,618 | 1.42%                                     | (0.73%, 2.78%)  | 1.00             |               |         |
|                                                        | HT/P-Ecl            | 6.7%                        | 9  | 117   | 2.00%                                     | (1.01%, 3.95%)  | 1.41             | (0.71, 2.77)  | 0.33    |

Table S22: The effect of BMI status at conception and GWG at delivery on the rate of neonatal respiratory distress

| Predictor                                              | Predictor groupings | Group %<br>BMI <sup>4</sup> | n  | N     | % in group with<br>condition <sup>5</sup> | 95%CI          | IRR <sup>5</sup> | 95%CI        | P-value |
|--------------------------------------------------------|---------------------|-----------------------------|----|-------|-------------------------------------------|----------------|------------------|--------------|---------|
| Outcome: Neonatal respiratory distress                 |                     |                             |    |       |                                           |                |                  |              |         |
| BMI (kg.m <sup>2</sup> ) at<br>conception <sup>1</sup> | <18.5               | 3.7%                        | 4  | 64    | 3.5%                                      | (1.5%, 8.5%)   | 0.87             | (0.36, 2.10) | 0.76    |
|                                                        | 18.5-25             | 40.6%                       | 36 | 704   | 4.1%                                      | (2.5%, 6.7%)   | 1.00             |              |         |
|                                                        | 25-30               | 27.0%                       | 28 | 469   | 5.2%                                      | (3.3%, 8.3%)   | 1.29             | (0.81, 2.05) | 0.29    |
|                                                        | 30-35               | 14.1%                       | 12 | 244   | 4.2%                                      | (2.2%, 7.8%)   | 1.03             | (0.55, 1.93) | 0.92    |
|                                                        | 35+                 | 14.6%                       | 16 | 254   | 4.8%                                      | (2.7%, 8.5%)   | 1.19             | (0.67, 2.11) | 0.56    |
| Birth GWG versus<br>recommendations<br><sup>1</sup>    | Within              | 43.5%                       | 39 | 754   | 4.1%                                      | (2.5%, 6.7%)   | 1.00             |              |         |
|                                                        | Above               | 43.6%                       | 36 | 757   | 4.4%                                      | (2.8%, 6.9%)   | 1.08             | (0.69, 1.70) | 0.74    |
|                                                        | Below               | 12.9%                       | 21 | 224   | 8.6%                                      | (5.3%, 13.9%)  | 2.12             | (1.30, 3.44) | 0.0024  |
| DM screening<br>status & result <sup>2</sup>           | GDM excluded        | 56.0%                       | 53 | 972   | 4.1%                                      | (2.5%, 6.7%)   | 1.00             |              |         |
|                                                        | GDM diagnosed       | 10.5%                       | 13 | 183   | 4.2%                                      | (2.3%, 7.6%)   | 1.04             | (0.58, 1.87) | 0.90    |
|                                                        | GDM not screened    | 33.4%                       | 30 | 580   | 3.0%                                      | (1.9%, 4.6%)   | 0.74             | (0.48, 1.15) | 0.18    |
| Whether<br>premature                                   | No prematurity      | 95.2%                       | 68 | 1,651 | 4.1%                                      | (2.5%, 6.7%)   | 1.00             |              |         |
|                                                        | Prem: 32-35 weeks   | 3.1%                        | 17 | 53    | 33.4%                                     | (21.2%, 52.7%) | 8.25             | (5.23, 13.0) | <0.0001 |
|                                                        | Prem: <32 weeks     | 1.8%                        | 11 | 31    | 42.7%                                     | (23.4%, 78.0%) | 10.54            | (5.77, 19.3) | <0.0001 |
| Age of mother<br>(years)                               | Mother <25          | 28.2%                       | 29 | 490   | 4.1%                                      | (2.5%, 6.7%)   | 1.00             |              |         |
|                                                        | Mother 25-35        | 59.7%                       | 54 | 1,035 | 3.9%                                      | (2.6%, 5.9%)   | 0.97             | (0.65, 1.46) | 0.90    |
|                                                        | Mother 35+          | 12.1%                       | 13 | 210   | 3.6%                                      | (1.9%, 6.9%)   | 0.89             | (0.47, 1.70) | 0.73    |
| SEIFA band <sup>3</sup>                                | High/middle SEIFA   | 65.2%                       | 68 | 1,132 | 4.1%                                      | (2.5%, 6.7%)   | 1.00             |              |         |
|                                                        | Low SEIFA           | 34.8%                       | 28 | 603   | 2.6%                                      | (1.7%, 4.0%)   | 0.64             | (0.42, 0.98) | 0.039   |
| Smoking                                                | Current non-smoker  | 74.3%                       | 63 | 1,289 | 4.1%                                      | (2.5%, 6.7%)   | 1.00             |              |         |
|                                                        | Current smoker      | 25.7%                       | 33 | 446   | 4.4%                                      | (3.8%, 5.2%)   | 1.09             | (0.93, 1.29) | 0.29    |
| Hypertension and/or<br>Pre-eclampsia                   | No HT/P-Ecl         | 93.3%                       | 90 | 1,618 | 4.1%                                      | (2.5%, 6.7%)   | 1.00             |              |         |
|                                                        | HT/P-Ecl            | 6.7%                        | 6  | 117   | 3.5%                                      | (1.6%, 7.7%)   | 0.86             | (0.39, 1.89) | 0.71    |

Table S23: The effect of BMI status at conception and GWG at delivery on the rate of other neonatal complications

| Predictor                                              | Predictor groupings | Group %<br>BMI <sup>4</sup> | n  | N     | % in group with<br>condition <sup>5</sup> | 95%CI          | IRR <sup>5</sup> | 95%CI        | P-value |
|--------------------------------------------------------|---------------------|-----------------------------|----|-------|-------------------------------------------|----------------|------------------|--------------|---------|
| Outcome: Other neonatal complications                  |                     |                             |    |       |                                           |                |                  |              |         |
| BMI (kg.m <sup>2</sup> ) at<br>conception <sup>1</sup> | <18.5               | 3.7%                        | 4  | 64    | 2.91%                                     | (1.05%, 8.11%) | 1.26             | (0.45, 3.50) | 0.66    |
|                                                        | 18.5-25             | 40.6%                       | 28 | 704   | 2.32%                                     | (1.23%, 4.35%) | 1.00             |              |         |
|                                                        | 25-30               | 27.0%                       | 17 | 469   | 2.21%                                     | (1.25%, 3.93%) | 0.96             | (0.54, 1.70) | 0.88    |
|                                                        | 30-35               | 14.1%                       | 6  | 244   | 1.40%                                     | (0.60%, 3.30%) | 0.61             | (0.26, 1.43) | 0.25    |
|                                                        | 35+                 | 14.6%                       | 13 | 254   | 3.03%                                     | (1.63%, 5.66%) | 1.31             | (0.70, 2.45) | 0.40    |
| Birth GWG versus<br>recommendations<br><sup>1</sup>    | Within              | 43.5%                       | 37 | 754   | 2.32%                                     | (1.23%, 4.35%) | 1.00             |              |         |
|                                                        | Above               | 43.6%                       | 21 | 757   | 2.04%                                     | (1.20%, 3.47%) | 0.88             | (0.52, 1.50) | 0.64    |
|                                                        | Below               | 12.9%                       | 10 | 224   | 2.55%                                     | (1.24%, 5.23%) | 1.10             | (0.54, 2.26) | 0.79    |
| DM screening<br>status & result <sup>2</sup>           | GDM excluded        | 56.0%                       | 24 | 972   | 2.32%                                     | (1.23%, 4.35%) | 1.00             |              |         |
|                                                        | GDM diagnosed       | 10.5%                       | 10 | 183   | 4.47%                                     | (2.22%, 9.00%) | 1.93             | (0.96, 3.89) | 0.065   |
|                                                        | GDM not screened    | 33.4%                       | 34 | 580   | 3.67%                                     | (2.15%, 6.26%) | 1.59             | (0.93, 2.70) | 0.090   |
| Whether<br>premature                                   | No prematurity      | 95.2%                       | 45 | 1,651 | 2.32%                                     | (1.23%, 4.35%) | 1.00             |              |         |
|                                                        | Prem: 32-35 weeks   | 3.1%                        | 7  | 53    | 10.2%                                     | (4.6%, 22.3%)  | 4.39             | (2.00, 9.63) | 0.0002  |
|                                                        | Prem: <32 weeks     | 1.8%                        | 16 | 31    | 41.1%                                     | (22.8%, 74.1%) | 17.75            | (9.85, 32.0) | <0.0001 |
| Age of mother<br>(years)                               | Mother <25          | 28.2%                       | 19 | 490   | 2.32%                                     | (1.23%, 4.35%) | 1.00             |              |         |
|                                                        | Mother 25-35        | 59.7%                       | 42 | 1,035 | 2.76%                                     | (1.69%, 4.50%) | 1.19             | (0.73, 1.94) | 0.48    |
|                                                        | Mother 35+          | 12.1%                       | 7  | 210   | 1.42%                                     | (0.68%, 2.98%) | 0.61             | (0.29, 1.29) | 0.20    |
| SEIFA band <sup>3</sup>                                | High/middle SEIFA   | 65.2%                       | 48 | 1,132 | 2.32%                                     | (1.23%, 4.35%) | 1.00             |              |         |
|                                                        | Low SEIFA           | 34.8%                       | 20 | 603   | 1.37%                                     | (0.84%, 2.21%) | 0.59             | (0.36, 0.95) | 0.031   |
| Smoking                                                | Current non-smoker  | 74.3%                       | 44 | 1,289 | 2.32%                                     | (1.23%, 4.35%) | 1.00             |              |         |
|                                                        | Current smoker      | 25.7%                       | 24 | 446   | 2.57%                                     | (2.09%, 3.16%) | 1.11             | (0.90, 1.36) | 0.32    |
| Hypertension and/or<br>Pre-eclampsia                   | No HT/P-Ecl         | 93.3%                       | 61 | 1,618 | 2.32%                                     | (1.23%, 4.35%) | 1.00             |              |         |
|                                                        | HT/P-Ecl            | 6.7%                        | 7  | 117   | 3.82%                                     | (1.84%, 7.92%) | 1.65             | (0.79, 3.42) | 0.18    |

Table S24: The effect of BMI status at conception and GWG at delivery on the rate of other birth injuries to baby

| Predictor                                              | Predictor groupings | Group %<br>BMI <sup>4</sup> | n  | N     | % in group with<br>condition <sup>5</sup> | 95%CI          | IRR <sup>5</sup> | 95%CI        | P-value |
|--------------------------------------------------------|---------------------|-----------------------------|----|-------|-------------------------------------------|----------------|------------------|--------------|---------|
| Outcome: Other birth injuries to baby                  |                     |                             |    |       |                                           |                |                  |              |         |
| BMI (kg.m <sup>2</sup> ) at<br>conception <sup>1</sup> | <18.5               | 3.7%                        | 1  | 64    | 1.64%                                     | (0.23%, 11.7%) | 0.33             | (0.05, 2.38) | 0.27    |
|                                                        | 18.5-25             | 40.6%                       | 41 | 704   | 4.93%                                     | (2.81%, 8.65%) | 1.00             |              |         |
|                                                        | 25-30               | 27.0%                       | 25 | 469   | 4.34%                                     | (2.68%, 7.01%) | 0.88             | (0.54, 1.42) | 0.60    |
|                                                        | 30-35               | 14.1%                       | 21 | 244   | 7.27%                                     | (4.44%, 11.9%) | 1.47             | (0.90, 2.42) | 0.12    |
|                                                        | 35+                 | 14.6%                       | 12 | 254   | 4.33%                                     | (2.22%, 8.44%) | 0.88             | (0.45, 1.71) | 0.70    |
| Birth GWG versus<br>recommendations<br><sup>1</sup>    | Within              | 43.5%                       | 35 | 754   | 4.93%                                     | (2.81%, 8.65%) | 1.00             |              |         |
|                                                        | Above               | 43.6%                       | 60 | 757   | 8.23%                                     | (5.48%, 12.4%) | 1.67             | (1.11, 2.51) | 0.014   |
|                                                        | Below               | 12.9%                       | 5  | 224   | 2.52%                                     | (0.99%, 6.38%) | 0.51             | (0.20, 1.29) | 0.16    |
| DM screening<br>status & result <sup>2</sup>           | GDM excluded        | 56.0%                       | 56 | 972   | 4.93%                                     | (2.81%, 8.65%) | 1.00             |              |         |
|                                                        | GDM diagnosed       | 10.5%                       | 8  | 183   | 4.43%                                     | (2.12%, 9.25%) | 0.90             | (0.43, 1.87) | 0.77    |
|                                                        | GDM not screened    | 33.4%                       | 36 | 580   | 5.86%                                     | (3.89%, 8.83%) | 1.19             | (0.79, 1.79) | 0.41    |
| Whether<br>premature                                   | No prematurity      | 95.2%                       | 96 | 1,651 | 4.93%                                     | (2.81%, 8.65%) | 1.00             |              |         |
|                                                        | Prem: 32-35 weeks   | 3.1%                        | 2  | 53    | 3.37%                                     | (0.87%, 13.0%) | 0.68             | (0.18, 2.64) | 0.58    |
|                                                        | Prem: <32 weeks     | 1.8%                        | 2  | 31    | 6.93%                                     | (1.73%, 27.7%) | 1.40             | (0.35, 5.61) | 0.63    |
| Age of mother<br>(years)                               | Mother <25          | 28.2%                       | 33 | 490   | 4.93%                                     | (2.81%, 8.65%) | 1.00             |              |         |
|                                                        | Mother 25-35        | 59.7%                       | 58 | 1,035 | 4.07%                                     | (2.71%, 6.11%) | 0.83             | (0.55, 1.24) | 0.36    |
|                                                        | Mother 35+          | 12.1%                       | 9  | 210   | 3.21%                                     | (1.58%, 6.53%) | 0.65             | (0.32, 1.32) | 0.24    |
| SEIFA band <sup>3</sup>                                | High/middle SEIFA   | 65.2%                       | 63 | 1,132 | 4.93%                                     | (2.81%, 8.65%) | 1.00             |              |         |
|                                                        | Low SEIFA           | 34.8%                       | 37 | 603   | 5.44%                                     | (3.64%, 8.14%) | 1.10             | (0.74, 1.65) | 0.63    |
| Smoking                                                | Current non-smoker  | 74.3%                       | 78 | 1,289 | 4.93%                                     | (2.81%, 8.65%) | 1.00             |              |         |
|                                                        | Current smoker      | 25.7%                       | 22 | 446   | 4.53%                                     | (3.73%, 5.51%) | 0.92             | (0.76, 1.12) | 0.40    |
| Hypertension and/or<br>Pre-eclampsia                   | No HT/P-Ecl         | 93.3%                       | 90 | 1,618 | 4.93%                                     | (2.81%, 8.65%) | 1.00             |              |         |
|                                                        | HT/P-Ecl            | 6.7%                        | 10 | 117   | 6.90%                                     | (3.64%, 13.1%) | 1.40             | (0.74, 2.65) | 0.30    |
